## Basal ganglia and cortical control of thalamic rebound spikes

Mohammadreza Mohagheghi Nejad<sup>1,2</sup>, Stefan Rotter<sup>1</sup>, Robert Schmidt<sup>3</sup>

<sup>1</sup>*Bernstein Center Freiburg & Faculty of Biology, University of Freiburg, 79104 Freiburg, Germany*

<sup>2</sup>*Department of Computational Science and Technology, School of Electrical Engineering and Computer Science, KTH Royal Institute of Technology, 100 44 Stockholm, Sweden*

<sup>3</sup>*Department of Psychology, University of Sheffield, S1 2LT Sheffield, United Kingdom*

**Abbreviated title:** Basal ganglia control of thalamic rebound spikes

**Corresponding Author:**

Mohammadreza M. Nejad, Bernstein Center Freiburg, University of Freiburg, Hansastrasse 9A, 79104 Freiburg, Germany. Email: m.mohaghegh@gmail.com

**Present address:**

Mohammadreza M. Nejad, Institute for Neural Computation, Ruhr University Bochum, Universitaetsstrasse 150, 44801 Bochum, Germany.

**Number of pages:** 54

**Number of figures:** 6

**Number of supplemental figures:** 3

**Number of tables:** 1

**Number of words Abstract:** 249

**Keywords (up to 5):** Parkinson's disease, Higher-order correlations, Nigrothalamic transmission, Active decorrelation, Nigral sensory responses

1 **Abstract**

2 Movement-related decreases in firing rate have been observed in basal ganglia output neurons.  
3 They may transmit motor signals to the thalamus, but the effect of these firing rate decreases  
4 on downstream neurons in the motor thalamus is not known. One possibility is that they  
5 lead to thalamic post-inhibitory rebound spikes. However, it has also been argued that the  
6 physiological conditions permitting rebound spiking are pathological, and primarily present in  
7 Parkinson's disease. As in Parkinson's disease neural activity becomes pathologically correlated,  
8 we investigated the impact of correlations in basal ganglia output on the transmission of motor  
9 signals using a Hodgkin-Huxley model of thalamocortical neurons. We found that such correlations  
10 disrupt the transmission of motor signals via rebound spikes by decreasing the signal-to-noise ratio  
11 and increasing the trial-to-trial variability. We further examined the role of sensory responses in  
12 basal ganglia output neurons and the effect of cortical excitation of motor thalamus in modulating  
13 rebound spiking. Interestingly, both could either promote or suppress the generation of rebound  
14 spikes depending on their timing relative to the motor signal. Finally, we determined parameter  
15 regimes, such as levels of excitation, under which rebound spiking is feasible in the model, and  
16 confirmed that the conditions for rebound spiking are primarily given in pathological regimes.  
17 However, we also identified specific conditions in the model that would allow rebound spiking to  
18 occur in healthy animals in a small subset of thalamic neurons. Overall, our model provides novel  
19 insights into differences between normal and pathological transmission of motor signals.

## 20 **Introduction**

21 The basal ganglia have long been implicated in the selection and execution of voluntary movements  
22 (Albin et al., 1989; Alexander and Crutcher, 1990b; Redgrave et al., 1999; Hikosaka et al., 2000).  
23 Classic “box-and-arrow” models of the basal ganglia (Alexander and Crutcher, 1990a; Wichmann  
24 and DeLong, 1996) presume a propagation of motor signals through the direct pathway. The direct  
25 pathway consists of direct, inhibitory projections from the striatum to the basal ganglia output  
26 regions. Therefore increased activity in the striatum reduces the activity e.g. in the substantia nigra  
27 pars reticulata (SNr) (Kravitz et al., 2010). SNr in turn disinhibits the motor thalamus (Deniau  
28 and Chevalier, 1985), and thereby enables movement. Basal ganglia output neurons often have  
29 high baseline firing rates and decrease their rate during movement in both rodents and primates  
30 (Hikosaka and Wurtz, 1983; Schultz, 1986; Leblois et al., 2007; Schmidt et al., 2013). However,  
31 recent studies have suggested a more complex picture on how basal ganglia output affects motor  
32 thalamus and motor cortex (Bosch-Bouju et al., 2013; Goldberg et al., 2013).

33 Three different modes have been proposed for how the basal ganglia output can affect thalamic  
34 targets (Goldberg et al., 2013). In the first mode sudden pauses in basal ganglia inhibition  
35 of thalamus could lead to “rebound” spikes in thalamocortical neurons due to their intrinsic  
36 T-type  $\text{Ca}^{2+}$  channels (Llinás and Jahnsen, 1982). T-type  $\text{Ca}^{2+}$  channels are de-inactivated  
37 during long-lasting hyperpolarization (e.g. due to inhibition from the basal ganglia output),  
38 and then activated during the release of this hyperpolarisation (e.g. during a pause in basal  
39 ganglia output), which depolarises the membrane potential of thalamocortical neurons. For strong

40 enough preceding hyperpolarisation, the membrane potential can even reach the spike threshold  
41 without any excitation (Person and Perkel, 2005; Person and Perkel, 2007; Leblois et al., 2009;  
42 Kim et al., 2017). However, thalamocortical neurons also receive excitatory input from cortex,  
43 which can change the effect of nigrothalamic inhibition. For moderate levels of cortical excitation  
44 the nigrothalamic transmission could operate in a disinhibition mode, in which the basal ganglia  
45 effectively gate cortical excitation, so that during pauses of inhibition the excitatory inputs can  
46 evoke spikes in the thalamocortical neuron (Kojima and Doupe, 2009; Bosch-Bouju et al., 2014;  
47 Edgerton and Jaeger, 2014). If the cortical excitation is strong enough, it is possible that inhibition  
48 from the basal ganglia can no longer prevent action potentials in the thalamocortical neurons,  
49 but instead controls their timing. In this “entrainment” mode the thalamocortical neuron spikes  
50 after the inhibitory input spikes from SNr with a short, fixed latency (Goldberg and Fee, 2012;  
51 Goldberg et al., 2012).

52 One prominent feature of the basal ganglia network is that neurons fire in an uncorrelated fashion,  
53 despite their overlapping dendritic fields and local recurrent connections (Wilson, 2013). Specific  
54 features of the basal ganglia such as pacemaking neurons and high firing rate heterogeneity may  
55 act as mechanisms for active decorrelation of activity. This effectively prevents correlations among  
56 neurons, and disrupting this mechanism leads to pathologically correlated activity as in Parkinson’s  
57 disease (Bar-Gad et al., 2003; Wilson, 2013). Increased correlated activity has also been observed  
58 in basal ganglia output neurons in Parkinson’s disease (Bergman et al., 1998), which can in  
59 turn increase correlated activity in the thalamus (Reitsma et al., 2011). Previous computational

60 modelling has shown that pathological basal ganglia output can prevent the thalamic relaying of  
61 cortical excitatory signals (Guo et al., 2008). Here we examined how pathological correlations  
62 in the basal ganglia output affect the transmission from the basal ganglia to the thalamus, and  
63 how this transmission is affected by cortical excitation. We assumed that the movement-related  
64 decreases in basal ganglia output transmit a motor signal to the thalamus and that this transmission  
65 operates in the rebound transmission mode. In addition to transmitting motor signals, basal  
66 ganglia output neurons may also be involved in further sensory and cognitive processing. For  
67 example, SNr neurons also respond to salient sensory stimuli instructing the initiation or stopping  
68 of movements (Pan et al., 2013; Schmidt et al., 2013). Therefore, we also investigated how these  
69 sensory responses may affect the motor transmission.

70 In the present study we used computational modelling to study the transmission from the basal  
71 ganglia to the thalamus via postinhibitory rebound spikes, with a focus on situations in which the  
72 basal ganglia output activity exhibits sudden movement-related pauses in activity. We found that  
73 for uncorrelated basal ganglia output this transmission had a high fidelity with low trial-to-trial  
74 variability in the thalamic response latency, but also occurred only under specific conditions with  
75 respect to synaptic connectivity, strength, and firing patterns. In contrast, pathological correlations  
76 in SNr strongly increased thalamic rebound spiking and led to a noisy transmission with high  
77 trial-to-trial variability. In addition, we found that sensory responses in SNr can, depending  
78 on their timing relative to the movement-related decrease, either facilitate or suppress rebound  
79 spikes. Therefore, in situations in which rebound spikes play a role for the transmission of motor

80 signals, uncorrelated activity and sensory responses in the basal ganglia output would support  
81 the coordinated transmission of motor signals. Finally, we found that the rebound spiking mode  
82 persisted in the presence of excitation that is strong enough to maintain baseline firing rates  
83 reported in vivo (Bosch-Bouju et al., 2014), and we discuss implications for rebound spiking under  
84 healthy and pathological conditions.

## 85 **Materials and Methods**

### 86 *Model neuron*

87 In this study we used a Hodgkin-Huxley type model of a thalamocortical neuron (Rubin and  
88 Terman, 2004). The model has four different ionic currents: a leak current ( $I_L$ ), a Na<sup>+</sup> current  
89 ( $I_{Na}$ ), a K<sup>+</sup> current ( $I_K$ ), and a T-type Ca<sup>2+</sup> current ( $I_T$ ), which are determined by the membrane  
90 potential  $v$ , the channel conductances  $g$  and reversal potentials  $E$ . While the conductance of the  
91 leak current  $g_L$  is constant, the conductance of the Na<sup>+</sup>, K<sup>+</sup> and T-type Ca<sup>2+</sup> currents depends on  
92 the membrane potential and varies over time. These voltage-dependent conductances are formed  
93 by the product of the maximum channel conductance ( $g_{Na}$ ,  $g_K$  and  $g_T$ ) and the voltage-dependent  
94 (in)activation variables ( $m$ ,  $h$ ,  $p$  and  $r$ ).

95 The model neuron's membrane potential is described by

$$C_m \frac{dv}{dt} + I_L + I_{Na} + I_K + I_T + I_{SNr \rightarrow TC} + I_{CX \rightarrow TC} = 0 \quad (1)$$

96 with a leak current  $I_L = g_L[v - E_L]$ . The Na<sup>+</sup> current  $I_{Na} = g_{Na}m^3(v)h[v - E_{Na}]$  has an instantaneous  
97 activation gating variable  $m_\infty(v) = \frac{1}{1 + \exp(-(v+37)/7)}$  and a slow inactivation gating variable  $h$  with

98  $\frac{dh}{dt} = \frac{h_{\infty}(v)-h}{\tau_h(v)}$  and steady-state  $h_{\infty}(v) = \frac{1}{1+\exp((v+41)/4)}$  that is approached with a time constant

99  $\tau_h(v) = \frac{1}{a_h(v)+b_h(v)}$ ;  $a_h(v) = 0.128 \exp(-(v+46)/18)$ ,  $b_h(v) = \frac{4}{1+\exp(-(v+84)/4)}$ .

100 The activation variable of the  $K^+$  current  $I_K = g_K[0.75(1-h)^4][v-E_K]$  is described in analogy to  
101 the  $Na^+$  inactivation variable ( $h$ ), which reduces the dimensionality of the model by one differential  
102 equation (Rinzel, 1985a).

103 The T-type  $Ca^{2+}$  current  $I_T = g_T p_{\infty}^2(v)r[v-E_T]$  has an instantaneous activation  $p_{\infty}(v) = \frac{1}{1+\exp(-(v+60)/6.2)}$

104 and slow inactivation  $\frac{dr}{dt} = \frac{r_{\infty}(v)-r}{\tau_r(v)}$  with the steady-state  $r_{\infty}(v) = \frac{1}{1+\exp((v+84)/4)}$  and time constant

105  $\tau_r(v) = 28 + 0.3(-(v+25)/10.5)$ . Accordingly, these steady states reach half their maximum

106 at -84mV ( $p_{\infty}$ ) and -60mV ( $r_{\infty}$ ), respectively. In Destexhe et al. (1998) slightly different values

107 (-80mV instead of -84mV and -56mV instead of -60mV) were used. Using these values in our

108 model did not lead to substantial changes in rebound spiking behavior of our model (Supplemental

109 Figure 1).

110 The T-type  $Ca^{2+}$  channel can cause post-inhibitory rebound spikes by the following mechanism.

111 Prolonged hyperpolarisation leads to de-inactivation of the T-type  $Ca^{2+}$  channel, i.e. the inactivation

112 gate ( $r$ ) opens while the activation gate ( $p$ ) closes. After shutting down the hyperpolarisation, the

113 inactivation gate closes slowly whereas the activation gate opens very fast. Therefore, while both

114 gates are open, the T-type  $Ca^{2+}$  conductance increases, inducing an inward current (described by

115  $I_T$ ) that leads to membrane depolarisation. If this depolarisation is strong enough, this can lead to

116  $Na^+$  spikes, which are then referred to as post-inhibitory rebound spikes.

117 The thalamic model neuron receives two types of synaptic inputs; one inhibitory from the basal  
118 ganglia output region SNr ( $SNr \rightarrow TC$ ) and one excitatory from cortex ( $CX \rightarrow TC$ ). Synaptic  
119 currents  $I_X$  are described by a simple exponential decay with the decay rate  $\beta_X$ , where  $X$  denotes  
120 the synapse type (Gerstner and Kistler, 2002). Similar to the intrinsic ionic currents, each synaptic  
121 current is described in terms of the membrane potential  $v$ , channel conductance  $g_X$ , and the reversal  
122 potential  $v_X$ :  $I_X = g_X[v - v_X]\sum_j s_j$ ;  $X = \{SNr \rightarrow TC, CX \rightarrow TC\}$ . When a presynaptic neuron  $j$   
123 spikes at time  $t_i$ ,  $s_j$  becomes 1 and decays with time constant  $\beta$  afterwards  $\frac{ds_j}{dt} = (1 - s_j)\delta(t - t_i) -$   
124  $\beta_X s_j$ , where  $\delta(t)$  is the Dirac delta function. With the conductance caused by a single presynaptic  
125 spike ( $s_j = 1$ ) given by  $g_X$ , the net synaptic current is therefore the sum of all presynaptic events  
126  $s_j$  multiplied by  $g_X$  and the difference between the membrane potential and synaptic reversal  
127 potential. In our model, the reversal potential for the inhibitory synapse is  $v_{SNr \rightarrow TC} = -85mV$   
128 (Rubin and Terman, 2004). With the given parameter settings, our model can evoke rebound  
129 spikes for  $v_{SNr \rightarrow TC} \leq -81mV$  (Supplemental Figure 1B). Therefore our model assumes a very  
130 low GABA reversal potential, which is, however, in the range of experimentally measured reversal  
131 potentials in thalamocortical neurons in the thalamus (Huguenard and Prince, 1994; Ulrich and  
132 Huguenard, 1997; Herd et al., 2013). Since there is still some uncertainty on the GABA reversal  
133 potential in different thalamic neurons, we checked whether the inhibitory postsynaptic potential  
134 evoked by such hyperpolarised reversal potentials is similar to the inhibitory postsynaptic potentials  
135 recorded from rats' motor thalamus in vitro. For the parameter settings used in our study (here  
136 30 synchronous spikes and a GABA maximum conductance of  $1 nS/\mu m^2$ ), we found that the  
137 inputs in this synaptic settings hyperpolarised the membrane by  $-17mV$ , which is very similar to in



138 vitro recordings from rats' motor thalamus (-18mV, Edgerton and Jaeger, 2014; their Figure 5B).  
139 Thalamic rebound spikes can also be driven by the basal ganglia in vivo (Kim et al., 2017), which is  
140 in line with very low GABA reversal potentials enabling rebound spikes. The intrinsic and synaptic  
141 parameters of the model neuron are described in Table 1.

#### 142 *Input spike trains*

143 We generated uncorrelated and correlated Poisson spike trains as inputs to the model neuron. To  
144 generate uncorrelated spike trains we simulated  $N$  independent Poisson processes, each with a  
145 firing rate  $r$ . To generate correlated spike trains with a given average pairwise correlation (denoted  
146 by  $\varepsilon$ ), we considered that for more than 2 input spike trains ( $N \geq 3$ ), different realisations of  
147 spike trains with different correlations of order 3 or higher are possible (Kuhn et al., 2003). For a  
148 convenient parametrisation of the order of correlation in input spike trains, we used the distribution  
149 of the number of coincident spikes in a time bin, referred to as “event amplitudes” ( $A$ ) (Staudé et  
150 al., 2010). For a homogeneous population of Poisson spike trains, the average pairwise correlation  
151 depends on the first two moments of the amplitude distribution  $f_A$ :

$$\varepsilon = \frac{\frac{E[A^2]}{E[A]} - 1}{N - 1} \quad (2)$$

152 In the present study, we considered binomial and exponential amplitude distributions (Figure 1).  
153 While the binomial amplitude distribution has a high probability density around the mean of  
154 the distribution (Figure 1A), the exponential distribution has a higher probability density toward

155 smaller amplitudes (Bujan et al., 2015, Figure 1B).

156 To generate spike trains with a binomial amplitude distribution we implemented a multiple  
157 interaction process (Kuhn et al., 2003, Figure 1A). For correlated outputs ( $\varepsilon > 0$ ), this was  
158 done by first generating a so-called “mother” spike train, a Poisson spike train with rate  $\lambda$ . We then  
159 subsampled from this mother spike train to derive the set of spike trains used in our simulations  
160 as convergent inputs to the model neuron. Each spike train in this set was derived by randomly  
161 and independently copying spikes of the “mother” spike train with probability  $\varepsilon$ . The firing rate of  
162 each spike train generated via this algorithm is  $r = \varepsilon\lambda$ .

163 We also generated spike trains using exponentially distributed amplitudes described by:

$$f_A(\xi; \tau) = \frac{e^{-\tau\xi}}{\sum_{k=1}^N e^{-\tau k}}; \xi \in [1, N] \quad (3)$$

164 where  $f_A(\xi; \tau)$  is the probability density function of event amplitudes  $\xi$  with the decay rate  
165 parameter  $\tau$ . According to Eq. 2, to compute  $\varepsilon$  for this distribution, we needed to compute  
166 the proportion of the second moment to the first moment for this distribution. We used the  
167 moment-generating function  $E[A^n] = \sum_{\xi=1}^N \xi^n f_A(\xi)$  to compute the first and second moments of  
168 the distribution and then applied it into Eq. 2, rewriting it to

$$\varepsilon = \frac{\frac{\sum_{\xi=1}^N \xi^2 e^{-\tau\xi}}{\sum_{\xi=1}^N \xi e^{-\tau\xi}} - 1}{N - 1} \quad (4)$$

169 This equation shows that  $\varepsilon$  depends on  $\tau$  and we took a simple numerical approach to find  $\tau$  for  
170 each desired  $\varepsilon$ . We computed  $\varepsilon$  for a range of  $\tau$  (from 0 to 5 with steps of 0.001) and then selected  
171 the  $\tau$  that yielded an  $\varepsilon$  closest to our desired  $\varepsilon$  (Figure 1C). The maximum error between the  $\varepsilon$  we  
172 calculated using Eq. 4 and the desired  $\varepsilon$  was  $5 \times 10^{-4}$ .

173 The next step was to generate the population spike trains using the probability distribution  
174 determined by the  $\tau$  we already computed. We drew  $N$  independent Poisson spike trains each  
175 for a given event amplitude  $\xi$  with rate  $r_{\xi} = Nrf_A(\xi)/\xi$ ;  $\xi \in [1, N]$ . Since  $\xi$  represents the  
176 number of coincident spikes in a time bin, spike times from independent spike trains should be  
177 copied  $\xi$  times to get the final population spike train used as inputs to the model neuron. As the  
178 amplitude distribution described in Eq. 3 has a high probability density toward lower amplitudes,  
179 high average pairwise correlations cannot be achieved. For typical parameters of the inhibitory  
180 input spike trains in this study ( $N = 30$ ,  $r = 50$  Hz), the maximum average pairwise correlation  
181 was less than 0.65 (Figure 1C).

#### 182 *Input spike trains with mixture of binomial and exponential amplitude distributions*

183 We computed the event amplitude distribution of SNr model neurons using a large-scale network  
184 model of the basal ganglia (Figure 2D; see also below). This amplitude distribution involved a  
185 mixture of exponential and binomial distributions leading to an average pairwise correlation of  
186 0.6 (black dot in Figure 2). To obtain spike trains following this mixed distribution, we first  
187 created one spike train with an exponential amplitude distribution contributing 20% of the spikes

188 with an average pairwise correlation of 0.25. Next, another spike train with a binomial amplitude  
189 distribution was generated (see above), contributing the remaining 80% of the spikes in the input  
190 spike train. We changed the average pairwise correlations of these input spike trains by only  
191 changing the average pairwise correlation of the subset with the binomial amplitude distribution.

#### 192 *Uncorrelated input spike trains with gradual decrease*

193 We captured the gradual movement-related decrease, which is observed experimentally, by using  
194 a sigmoid function to describe the firing rate of the input spike trains as a function of time  $r(t) =$   
195  $50(1 - 1/[1 + e^{-a(t-t_{mov})}])$  Hz. We varied the slope parameter,  $a$ , to change the slope of the firing  
196 rate decrease.  $t_{mov}$  is the time point (in this study at one second), when the firing rate decreases to  
197 the half maximum, i.e.  $r(t_{mov}) = 25$  Hz.

#### 198 *Data analysis: identifying rebound spikes*

199 The model neuron can fire spikes in response to excitatory input or due to release from inhibition  
200 with post-inhibitory rebound spikes. Therefore, one challenge was to distinguish “normal”  
201 spikes driven by excitatory inputs from post-inhibitory rebound spikes. In mice studies, genetic  
202 approaches are often used to knockout T-type  $\text{Ca}^{2+}$  channels, which are critical for generation  
203 of post-inhibitory rebound spikes (Kim et al., 2017). We adopted this in our model by simply  
204 removing the T-type  $\text{Ca}^{2+}$  channels in our model (i.e.  $g_T = 0 \text{ nS}/\mu\text{m}^2$ ). However, this also caused  
205 changes in the intrinsic properties of the model neuron such as its excitability. We therefore took a  
206 more elaborate approach tailored to each of the two excitation scenarios, single excitatory spikes

207 (Figure 5) and spontaneous excitation (Figure 6).

208 For the simulations with a single excitatory input spike the identification of rebound spikes was  
209 straightforward because the used excitatory strengths were subthreshold and thus could evoke  
210 no spikes. Therefore, we labelled all generated spikes as rebound spikes. However, for the  
211 simulations with ongoing excitation, the excitatory input was able to evoke “normal” spikes as  
212 well. To identify rebound spikes there, we simulated the model neuron with three different input  
213 combinations, inhibition-only, excitation-only and inhibition-excitation. For inhibition-only input,  
214 we determined the output firing rate of the model neuron purely due to rebound spiking ( $f_I$ ). In  
215 addition, we determined the time window in which the model neuron fired those rebound spikes  
216 (as this was typically in a short time window just after the movement-related decrease). We then  
217 compared the rebound-driven firing rate in this time window with the firing rate  $f_E$  obtained from an  
218 excitation-only simulation (i.e. without any inhibitory input, so no rebound spikes). Finally, we fed  
219 our model with both inputs (inhibition-excitation) and computed the firing rate in that time window,  
220 which involved both rebound and non-rebound spiking ( $f_{EI}$ ). We then computed the proportion of  
221 rebound spiking as:  $\frac{f_{EI}-f_E}{f_I}$ .

222 *Data analysis: transmission quality*

223 For our simulations shown in Figure 2, we needed to quantify the transmission quality for a variety  
224 of inputs strengths and degrees of correlation. For a high-fidelity transmission of the motor signal  
225 the thalamocortical neuron would ideally respond only to the movement-related decrease of activity

226 in SNr neurons with a rebound spike, and be silent otherwise. Any rebound spike before the  
227 movement-related decrease would make the transmission noisy, in the sense that the decoding of  
228 the presence and timing of the motor signal in thalamic activity would be less accurate. Therefore,  
229 we used the number of spikes after the onset of the movement-related decrease, normalised by the  
230 total number of spikes within -1 s to 0.5 s around the onset of the movement-related decrease as a  
231 measure of the transmission quality.

### 232 *Large-scale model of the basal ganglia*

233 We utilised a large-scale network model of the basal ganglia (Lindahl and Kotaleski, 2016) to  
234 compute the distribution of event amplitudes in SNr during pathological activity in dopamine-depleted  
235 basal ganglia. This network model mimics the pathological activity pattern observed experimentally  
236 in a rat model of Parkinson's disease. To achieve the pathological activity pattern in SNr, we ran  
237 this model using a default parameter set originally from this network model. This parameter set  
238 involved setting dopamine modulation factor to zero and inducing a 20-Hz modulation to the  
239 emulated cortical inputs to the basal ganglia regions (for details see Lindahl and Kotaleski, 2016).

### 240 *Software packages*

241 We implemented the model neuron in Simulink, a simulation package in MATLAB (R2016b) and  
242 used a 4th-order Runge-Kutta method to numerically solve the differential equations (time step =  
243 0.01 ms). We wrote all scripts to generate input spike trains, handle simulations and analyse and  
244 visualise the simulation data in MATLAB. For our simulations we used the bwForCluster NEMO,

245 a high-performance compute resource at Freiburg University.

## 246 **Results**

### 247 *Uncorrelated activity prevents rebound spiking*

248 Correlated activity in the basal ganglia is usually considered pathological (Bergman et al., 1998;  
249 Bar-Gad et al., 2003; Wilson, 2013) and might lead to the generation of rebound spikes (Edgerton  
250 and Jaeger, 2014). To determine how correlated activity in basal ganglia output affects rebound  
251 spiking, we simulated a thalamocortical neuron exposed to inhibitory Poisson input spike trains  
252 with varying degrees of correlation (Figure 2). Including only inhibitory inputs, in the first  
253 step, enabled us to elucidate the characteristics of inhibition that are essential for generating  
254 rebound spikes and facilitated the identification of post-inhibitory rebound spikes by excluding  
255 the possibility for evoking excitatory-driven spikes. We used binomial and exponential amplitude  
256 distributions to generate correlated Poisson spike trains (see Materials and Methods). In addition,  
257 we modulated the input firing rate so that it mimicked the prominent movement-related decrease  
258 of basal ganglia output neurons observed in experimental studies (Hikosaka and Wurtz, 1983;  
259 Schultz, 1986; Leblois et al., 2007; Schmidt et al., 2013).

260 For uncorrelated inputs the model responded to the movement-related decrease with a single  
261 rebound spike (Figure 2A, left panel). However, for correlated inputs rebound spikes appeared  
262 not only after the movement-related decrease, but also at random times during baseline activity  
263 (Figure 2A, middle and right panels). The reason for this was that correlated SNr activity led not

264 only to epochs with many synchronous spikes, but also to pauses in the population activity that  
265 were long enough to trigger rebound spikes.

266 While studies on songbirds suggest strong one-to-one projections from Area X (basal ganglia  
267 output equivalent in avians) to the medial portion of the dorsolateral nucleus of the anterior  
268 thalamus (DLM) (Person and Perkel, 2005; Leblois et al., 2009), in rats multiple inhibitory  
269 projections from SNr converge on a single thalamocortical neuron (Edgerton and Jaeger, 2014),  
270 which affects the strength of the inhibition on the thalamocortical neuron. Electron microscopic  
271 studies of these projections show a similar synaptic structure in rats and monkeys suggesting that  
272 the rodent nigrothalamic pathway can be a valid model for studying GABAergic transmissions in  
273 primates (Bodor et al., 2008). Similar to the synaptic strength, the precise degree of nigrothalamic  
274 convergence is not known. Edgerton and Jaeger (2014) estimated that 3-13 SNr neurons project  
275 to a single thalamocortical neuron. As they noted that this may be an underestimate due to  
276 experimental limitations of opsin expression, we chose a larger number (30) for the degree of  
277 convergence. However, in our model rebound spikes also occurred for a smaller number of inputs  
278 ( $20 < N < 30$ ; Supplemental Figure 2). To determine whether these factors are relevant for our  
279 findings on the transmission quality, we repeated our simulations for different inhibitory strengths,  
280 but found that the transmission quality did not depend on the inhibitory strength as long as the  
281 inhibition was strong enough to lead to rebound spikes (Figure 2D). As for more than two inputs  
282 the input spike trains cannot be uniquely characterised by pairwise correlations, we considered  
283 two different possibilities for higher-order correlations (see Materials and Methods). We found



284 that the transmission quality strongly depended on both the input average pairwise correlation and  
285 higher-order correlations among input spike trains (Figure 2B).

286 Pairwise correlations affected the transmission for a binomial amplitude distribution (Figure 2B,  
287 dark blue trace). For a binomial amplitude distribution higher-order events (“population bursts”)  
288 are common, which increases the probability for pauses in the population activity. Thereby, even  
289 weak correlations among SNr spike trains led to a sharp decrease in the transmission quality.  
290 In contrast, for spike train correlations with an exponential amplitude distribution, the decrease  
291 in transmission quality was less pronounced (Figure 2B, grey trace). This was because for the  
292 exponential amplitude distribution lower-order events are more common, which are not sufficient  
293 for pauses in the population activity of SNr neurons leading to thalamic rebound spikes. Therefore,  
294 in particular higher-order correlations may be responsible for pathological increases in rebound  
295 spiking and disrupt motor signalling.

296 We further investigated whether the substantial decrease in the transmission quality observed for the  
297 binomial amplitude distribution depended on millisecond synchrony of correlated spike times. We  
298 jittered the synchronous spike events using different time windows (Figure 2C), which corresponds  
299 to correlations on slower timescales. We found that the transmission quality decreased for jittering  
300 timescales  $\leq 20$  ms similar to inputs with correlations on a millisecond timescale (i.e. without  
301 jittering), confirming that the decrease in transmission quality does not depend on millisecond  
302 synchrony. However, correlations on the timescale of 50 ms did not substantially influence the  
303 transmission quality, as was expected due to the lack of population pauses.

304 The purpose of our simulation of correlated activity was to mimic basal ganglia output patterns  
305 in Parkinson's disease. However, as the event amplitude distribution of pathologically correlated  
306 activity in SNr is currently unknown, we employed a large-scale model of the basal ganglia  
307 (Lindahl and Kotaleski, 2016), in which beta oscillations propagate through cortico-basal ganglia  
308 circuits (see Materials and Methods). Beta oscillations are widely observed in animals with  
309 dopamine-depleted basal ganglia including their output nuclei (Brown et al., 2001; Avila et al.,  
310 2010). While beta oscillations can be generated in the pallido-subthalamic loop (Kumar et al.,  
311 2011; Mirzaei et al., 2017), here we did not assume a specific mechanism for the generation  
312 of correlated activity in Parkinson's disease, but focussed on the event amplitude distribution  
313 in SNr in a simulation of Parkinson's disease. We found that the amplitude distributions in  
314 the dopamine-depleted state of the large-scale model were somewhere in between binomial and  
315 exponential (Figure 2E).

316 To investigate the model with a correlation structure that might be relevant for Parkinson's disease,  
317 we generated input spike trains based on a mixture of binomial and exponential distributions (see  
318 Materials and Methods). We then investigated the effect of different average pairwise correlations  
319 in this mixed distribution. We found that increasing the average pairwise correlation of the  
320 binomial component of the mixed distribution had a similar effect on the transmission quality as  
321 in the standard binomial amplitude distribution (Figure 2B, red and blue traces). Furthermore,  
322 for the average pairwise correlation found from the large-scale model for Parkinson's disease  
323 the transmission quality was low (Figure 2B, black dot). This suggests that under a correlation

324 structure similar to Parkinson's disease, even weak correlations in basal ganglia output may impair  
325 the transmission of motor signals in the rebound transmission mode. Whether this mechanism  
326 could contribute to motor symptoms in Parkinson's disease, also depends on the structure of  
327 excitatory inputs (Magnin et al., 2000; Edgerton and Jaeger, 2014; Kim et al., 2017).

328 *Uncorrelated activity increases transmission speed and reduces variability*

329 Having demonstrated that correlated activity can increase pathological rebound spiking, we next  
330 examined whether correlations can also affect transmission speed and trial-to-trial variability. We  
331 assumed here that movement-related decreases in the firing rate of basal ganglia output neurons  
332 transmit motor signals to the thalamus via the rebound transmission mode.

333 To study the effect of input correlations on transmission speed, we used the same scenario as  
334 above (Figure 2) and measured the time between the onset of the movement-related decrease and  
335 the rebound spike. We found that the transmission speed was fastest for no or weak correlations,  
336 and slower for stronger correlations (Figure 3A). Therefore, at least in this simplified scenario  
337 without excitation, uncorrelated activity in basal ganglia output regions may also promote the  
338 fast transmission of motor signals. To generalise our findings on the transmission speed beyond  
339 the scenario using the movement-related decrease, we further examined transmission speed using  
340 (rebound) spike-triggered averages of inputs. Instead of simulating a movement-related decrease,  
341 we exposed the model neuron to inhibitory inputs with a constant firing rate. To compute the  
342 spike-triggered average, we used the peak of each rebound spike as the reference time point to

343 compute the average of the preceding input. Since rebound spikes occurred more often for stronger  
344 input correlations, we performed this analysis on inputs having a correlation coefficient of either  
345 0.3 or 1.0. These simulations confirmed that weak input correlations induce faster transmission  
346 than strong correlations (Figure 3C).

347 For the transmission of motor signals via rebound spikes the trial-to-trial variability of the  
348 transmission speed may be important. For example, to coordinate motor signals across different  
349 neural pathways low variability (i.e. high precision) of the transmission speed might be necessary.  
350 To investigate the nigrothalamic transmission variability, we computed the variance over the  
351 latencies across 100 trials with movement-related decreases in SNr activity (i.e. the same scenario  
352 as in Figure 3A). We found that for uncorrelated inputs transmission was very precise in the  
353 sense that the trial-to-trial variability of the response latency was small (Figure 3B). In contrast,  
354 even weak correlations led to a high transmission variability due to changes in the amount of  
355 hyperpolarisation caused by correlated inputs preceding rebound spikes. This simplified scenario,  
356 without excitation, suggests that uncorrelated inhibitory inputs may enable a high precision of the  
357 transmission via rebound spikes by reducing the trial-to-trial variability in response latency.

358 *Sensory responses can promote or suppress rebound spiking*

359 SNr neurons often have short-latency responses to salient sensory stimuli characterised by brief  
360 increases in firing rate (Pan et al., 2013). In rats performing a stop-signal task these responses  
361 also occurred in neurons that decreased their activity during movement (Schmidt et al., 2013).

362 This included responses to auditory stimuli, which cued the initiation of a movement (Go cue) or  
363 the cancellation of an upcoming movement (Stop cue). While in these experiments sensory cues  
364 prompted movement, we assume here that similar responses also occur in other behavioural  
365 contexts. We examined how brief increases in SNr activity, similar to sensory responses,  
366 affect transmission in the rebound spiking mode (Figure 4). The thalamocortical model neuron  
367 received inputs similar to the SNr firing patterns recorded in rats during movement initiation  
368 (i.e. uncorrelated inputs with high baseline firing rate and a sudden movement-related decrease).  
369 To model sensory responses in the SNr neurons, we added a brief increase in firing rate at different  
370 time points relative to the movement-related decrease (Figure 4A). We generated the brief increase  
371 by adding a single spike in each spike train having the sensory response at the desired time point.  
372 This allowed us to observe the effect of the timing of sensory responses on rebound spiking.

373 To quantify the effect of sensory responses, we measured the difference in the probability of  
374 generating a rebound spike after the movement-related decrease in simulations with and without  
375 sensory responses. Interestingly, the sensory responses could either increase or decrease the  
376 probability of generating a rebound spike, depending on their relative timing to the movement-related  
377 decrease (Figure 4B). For sensory responses preceding the movement-related decrease for up  
378 to 40 ms, the probability of generating a rebound spike was increased. This was because the  
379 sensory response led to additional hyperpolarisation in the thalamocortical neuron, which promoted  
380 rebound spiking. In contrast, for sensory responses occurring 10-40 ms after the movement-related  
381 decrease, the probability of generating a rebound spike was decreased. This was because the

382 sensory response in that case partly prevented the movement-related pause of SNr firing. Together,  
383 this points to the intriguing possibility that sensory responses in SNr can have opposite effects on  
384 behaviour (either promoting or suppressing movement), depending on their timing (Figure 4B).  
385 This could explain why SNr neurons respond to both Go and Stop cues with a similar increase in  
386 firing rate (Schmidt et al., 2013; Mallet et al., 2016), a previously puzzling finding (see Discussion).  
387 However, in an *in vivo* situation, there would likely be additional excitatory inputs to both SNr and  
388 the thalamus, which would affect whether rebound spikes are generated in this situation.

389 In addition to the timing of sensory responses relative to the movement-related decrease, also the  
390 inhibitory input strength modulated the probability of generating a rebound spike (Figure 4C).  
391 For weaker inhibitory inputs ( $g_{SNr \rightarrow TC} = 0.25nS/\mu m^2$ ), the probability of generating a rebound  
392 spike was increased because the additional inhibitory inputs contributed to the hyperpolarisation  
393 of the thalamocortical neuron. However, for slightly stronger inputs ( $g_{SNr \rightarrow TC} \geq 0.35nS/\mu m^2$ ), the  
394 sensory responses could not further facilitate rebound spiking because the probability of generating  
395 a rebound spike was already one. Accordingly, sensory responses were most effective in reducing  
396 the probability of generating a rebound spike for medium input strengths (i.e. with a relatively  
397 high probability of generating a rebound spike). We found that the most effective strength for  
398 suppressing rebound spikes was at  $g_{SNr \rightarrow TC} = 0.35nS/\mu m^2$ . However, the suppressing effect  
399 vanished for  $g_{SNr \rightarrow TC} \geq 0.8nS/\mu m^2$  because for this strength, without any excitatory inputs, the  
400 sensory responses themselves caused a hyperpolarization strong enough to trigger a rebound spike  
401 (Figure 4C). Therefore, the effect of sensory responses in SNr on motor signals strongly depended

402 on the nigrothalamic connection strength.

403 *Rebound spikes in the presence of excitation*

404 Having studied basic properties of rebound spiking in the model under somewhat idealised  
405 conditions, we next extended the model to account for further conditions relevant in vivo. For  
406 example, we have assumed so far that the thalamocortical neuron receives input from SNr neurons  
407 that decrease their activity during movement. However, electrophysiological recordings in SNr  
408 and other basal ganglia output neurons have also identified neurons that do not decrease their  
409 activity during movement (Schmidt et al., 2013). Therefore, we investigated the response of the  
410 thalamocortical model neuron in a scenario in which only a fraction of SNr inputs decreased their  
411 firing rates, while the remaining neurons did not change their rates (Figure 5). We found that the  
412 thalamocortical model neuron elicited a rebound spike with high probability only when a large  
413 fraction of input neurons decreased their firing rates to zero (Figure 5A). If we assume random  
414 connectivity, this would mean that only a very small percentage of thalamic neurons receives  
415 inputs from a sufficient number of nigral neurons with a movement-related decrease to elicit  
416 rebound spikes. Therefore, in order for this mechanism to apply to healthy animals, non-random  
417 connectivity would be required, so that different nigral neurons with movement-related decreases  
418 in firing rate preferentially converge onto the same thalamic target neuron.

419 The large fraction of SNr neurons required to exhibit a movement-related decrease in order  
420 to elicit a rebound spike downstream constrains the scenario under which this transmission is

421 plausible in vivo. However, in a more realistic scenario the thalamocortical neuron also receives  
422 excitatory inputs (e.g. from cortex). Therefore, we examined whether excitatory input can, under  
423 some conditions, enhance the transmission via rebound spiking (Figure 5B-D). Importantly, the  
424 excitatory inputs should be weak enough in order not to elicit spikes themselves. We simulated  
425 the model neuron by adding a single excitatory input spike with variable timing with respect  
426 to the movement-related decrease in the inhibitory inputs, and observed whether it promoted or  
427 suppressed rebound spikes. Using single input excitatory spikes enabled us to accurately determine  
428 the minimal excitatory conductance that was required for modulating rebound spikes. While  
429 our results below indicate that single spikes can have a powerful effect on modulating rebound  
430 spikes, this does not necessarily mean that these processes also rely on single spikes in vivo. We  
431 investigated the effect of the excitatory spike on the probability of generating a rebound spike by  
432 comparing a simulation including excitatory and inhibitory inputs with a simulation that included  
433 only inhibitory inputs. We found that for parameter regions in which the probability of generating  
434 a rebound spike was usually small (i.e. in the dark blue region in Figure 5A), additional excitatory  
435 spikes after the movement-related decrease increased the rebound probability (Figure 5B). We  
436 confirmed that these spikes in the thalamocortical neuron are actually rebound spikes (and not just  
437 driven by the excitatory input; see Materials and Methods). However, for strong excitation, the  
438 thalamocortical model neuron spiked also before the SNr movement-related decrease, indicating  
439 that these spikes were no longer rebound spikes.

440 For parameter regions in which the probability of generating a rebound spike was high (i.e. outside



441 the dark blue region in Figure 5A), the excitatory input spikes could also suppress the generation of  
442 rebound spikes when they occurred before the movement-related decrease (Figure 5C). In contrast,  
443 when the excitatory input spike occurred after the movement-related decrease, it enhanced the  
444 probability of generating a rebound spike. Therefore, similar to the complex effect of sensory  
445 responses in SNr neurons described above, also the excitatory input to the thalamocortical neurons  
446 could either promote or prevent rebound spikes depending on its timing. Furthermore, if only a  
447 fraction of SNr neurons exhibited a movement-related decrease, precisely timed excitatory input  
448 could promote the transmission of motor signals to thalamocortical neurons (Figure 5D). Overall,  
449 our simulations indicate that rebound spikes can also occur in a parameter regime that includes  
450 excitation. Furthermore, precisely timed excitation provides an additional mechanism of rebound  
451 spike modulation. In monkeys performing a learned reaching movement, thalamic excitation seems  
452 to precede basal ganglia motor output (Schwab et al., 2020), which according to our model could  
453 therefore indicate that excitatory inputs to the thalamus are timed to suppress rebound spiking in  
454 healthy animals.

#### 455 *Role of the slope of the movement-related decrease*

456 So far we assumed that the movement-related decreases in SNr firing rate are abrupt. However,  
457 electrophysiological recordings in rodents (Schmidt et al., 2013) and non-human primates (Hikosaka  
458 and Wurtz, 1983; Schultz, 1986; Leblois et al., 2007) indicate that, at least in data averaged over  
459 trials, the firing rate decreases can also be more gradual. Therefore, we investigated the impact  
460 of input spike trains with various slopes (see Methods) on rebound spikes (Figure 5E). We found

461 that steep slopes of the movement-related firing rate decrease led to rebound spikes with high  
462 probability and small timing variability (Figure 5F). In contrast, more gradual movement-related  
463 decreases reduced the probability of rebound spikes and increased the spike timing variability.

464 We further investigated the impact of single excitatory spikes (similar to above) on the probability  
465 of rebound spikes for different SNr firing rate slopes (Figure 5G). We found that, if the slope was  
466 too small to reliably evoke rebound spikes (low rebound probability), excitatory spikes briefly  
467 after the onset of the movement-related decrease could increase the probability of rebound spikes.  
468 In contrast, for steeper slopes, the probability of rebound spikes decreased when the excitatory  
469 spike occurred before the movement-related decrease. These results further support that excitation  
470 can powerfully modulate rebound spiking and even promote rebound spikes under circumstances  
471 in which the inhibitory input characteristics are by themselves insufficient for the generation  
472 of rebound spikes. Furthermore, rebound spiking is reduced, if cortical excitation precedes the  
473 movement-related decrease. This may be the case in healthy animals performing learned reaching  
474 movements (Schwab et al., 2020).

#### 475 *Transmission modes revisited: prevalence of rebound spiking*

476 The interaction of excitation and inhibition in thalamocortical neurons is important because even  
477 weak excitation may change the transmission mode from rebound to disinhibition (Goldberg  
478 et al., 2013). As we observed rebound spiking in the presence of single excitatory spikes  
479 (Figure 5), we further investigated how ongoing excitation affects the mode of nigrothalamic

480 transmission. As before, we simulated the model neuron with movement-related inhibitory inputs,  
481 but added a background excitation mimicking input from many cortical neurons in the form  
482 of a Poisson spike train with the firing rate of 100 Hz and examined the effect of changing  
483 excitatory strength (Figure 6). In an idealised scenario the model neuron spikes exclusively after  
484 the SNr movement-related decrease for both the rebound and disinhibition transmission modes.  
485 These spikes are either post-inhibitory rebound spikes (in the rebound mode), or the result of  
486 depolarisation through excitation (in the disinhibition mode). However, we found that rebound and  
487 disinhibition modes could also coexist in regimes in which the model neuron has non-zero baseline  
488 firing rates (Figure 6A).

489 We characterised the nigrothalamic transmission mode (see Materials and Methods) according to  
490 the proportion of trials with rebound spikes for a range of inhibitory and excitatory inputs strengths  
491 (Figure 6A). Motor signals were transmitted via rebound spikes even in the presence of weak  
492 excitatory inputs ( $g_{CX \rightarrow TC} \leq 1.5 \text{ nS}/\mu\text{m}^2$ ; Figure 6A). Interestingly, the transition from rebound to  
493 disinhibition mode was not abrupt, but there was a region where disinhibition and rebound spikes  
494 coexisted (Figure 6B). In these overlapping regions rebound spiking seemed to be the dominant  
495 firing pattern with a strong, transient firing rate increase in response to the movement-related  
496 decrease, a phenomenon which was already observed in anaesthetised songbirds (Kojima and  
497 Doupe, 2009; Figure 6D, E; see also Discussion). We also examined the effects of varying the  
498 firing rate of the excitatory inputs (200, 500, and 1000 Hz). While the rebound and disinhibition  
499 spiking mode still overlapped, the corresponding parameter region was shifted towards lower

500 excitatory conductances. For moderate excitatory input firing rates (100 and 200 Hz), rebound  
501 spiking occurred also in regions in which the model neuron was spontaneously active (Figure 6E).  
502 This overlap was present for spontaneous activity up to 3 Hz in line with the average spontaneous  
503 firing of motor thalamus neurons in rats during open-field behavior (Bosch-Bouju et al., 2014).  
504 However, for higher spontaneous activity (>7 Hz) rebound spiking vanished (Figure 6F). We  
505 conclude that the model neuron can transmit motor signals in the rebound mode also in the  
506 presence of excitatory inputs.

507 We also characterised the transmission precision for different transmission modes by computing  
508 the standard deviation of the timing of the first spike after the movement-related decrease across  
509 trials (Figure 6B). For the rebound transmission mode, the transmission precision was maximal  
510 (i.e. minimal timing standard deviation), but as the proportion of trials with disinhibition mode  
511 increased, the transmission precision decreased. In the weak inhibition and excitation regime,  
512 where rebound and disinhibition modes coexisted and the baseline firing rate of the model neuron  
513 was low (< 7 Hz), the precision was smallest. This is important because the spiking variability  
514 can be characterised in electrophysiological recordings and may thus provide an indication of the  
515 transmission mode *in vivo*.

516 In summary, our computational model points to new functional roles for uncorrelated basal  
517 ganglia output in the high-fidelity transmission of motor signals. We characterised conditions  
518 and parameter regimes under which rebound spikes can occur in the thalamus as a response to  
519 movement-related decreases in firing rate of basal ganglia output neurons. In our model neuron,

520 rebound spiking requires that most input from basal ganglia neurons exhibits movement-related  
521 pauses or synchronous baseline activity, and that inhibitory inputs are strong relative to the  
522 excitatory inputs. Therefore, our model is in line with previous studies arguing that the conditions  
523 for rebound spiking are primarily given in pathological situations. However, our model also points  
524 to the possibility that rebound spikes could occur in healthy animals, but only under rather specific  
525 conditions with respect to the connectivity and inputs, in a small subset of thalamic neurons.

## 526 **Discussion**

527 We used computational modelling to study the impact of spike train correlations in the basal ganglia  
528 output on the transmission of motor signals. Based on previous studies we focused our description  
529 on movement-related pauses in SNr activity (Hikosaka and Wurtz, 1983; Schultz, 1986; Leblois  
530 et al., 2007; Schmidt et al., 2013) and examined their effect on motor thalamus in the rebound  
531 transmission mode. However, as also neurons in e.g. the superior colliculus can respond with  
532 a rebound spike after prolonged hyperpolarisation (Saito and Isa, 1999), our modelling results  
533 might apply more generally. Furthermore, while previous studies identified the important role  
534 of excitation in determining regimes in which rebound spikes can occur (Goldberg et al., 2013;  
535 Edgerton and Jaeger, 2014), our model produced rebound spikes in a wider parameter regime,  
536 also in the presence of excitation (Figure 6). In addition, rebound spiking overlapped with the  
537 disinhibition transmission mode, indicating that the different transmission modes might not always  
538 be clearly separable. In our model, the impaired nigrothalamic transmission of motor signals for  
539 correlated inputs also indicates a potential functional role of uncorrelated activity in basal ganglia

540 output regions, possibly as a result of active decorrelation (Wilson, 2013).

541 While we focussed here on the conditions and properties of rebound spiking, our model did  
542 not support that rebound spiking is the dominant nigrothalamic transmission mode in healthy  
543 animals. In line with previous studies, we found that rebound spiking primarily occurs for  
544 correlated activity (mimicking pathological conditions). Furthermore, rebound spiking depended  
545 on three main parameters of the nigrothalamic connections: the strength of inhibition, the degree  
546 of convergence, and the number of rate-decreasing SNr neurons. Currently, the values of these  
547 parameters are unknown, but experimental studies provide rough estimates, and our computational  
548 approach allowed us to determine the range of parameter values under which rebound spikes  
549 can occur. In addition, basal ganglia output neurons have heterogeneous firing patterns during  
550 motor tasks (Hikosaka and Wurtz, 1983; Schultz, 1986; Leblois et al., 2007; Schmidt et al., 2013;  
551 Schwab et al., 2020). Therefore, it seems plausible that also the transmission mode may vary across  
552 neurons and over time. Accordingly, rebound spiking may only occur under specific circumstances  
553 in motor thalamus and involve only a subset of neurons. Similarly, our modelling results indicated  
554 that there may be specific conditions in which rebound spiking could also occur in healthy animals.  
555 For example, synchronous movement-related pauses in many SNr neurons might constitute a  
556 transient signal that could lead to rebound spiking in a subset of neurons in the motor thalamus.  
557 However, this would require strong and specific connections from SNr to thalamus so that SNr  
558 neurons with the same firing pattern converge onto the same thalamocortical neuron. As these  
559 rebound spikes would only form a small subset of the total number of thalamic spikes, it might be

560 difficult to detect them in extracellular recordings (Schwab et al., 2020).

561 Our modelling results also indicated that rebound spiking depends on the baseline firing rate  
562 of motor thalamus neurons. Notably, neurons with a low baseline firing rate may be more  
563 likely to transmit motor signals via rebound spikes (Fig. 6A). From experimental studies we  
564 know that neurons in the motor thalamus have diverse baseline firing rates (Guo et al., 2017;  
565 Gaidica et al., 2018). Therefore, we would predict that the subset of neurons with low baseline  
566 firing rates are more likely to exhibit rebound spikes, when receiving synchronous inputs. In  
567 addition, the nigrothalamic connection strength was an important parameter in our simulations,  
568 with stronger connections favouring rebound spike generation (Fig. 6A; see also Kuramoto et al.,  
569 2011). Therefore, any change in nigrothalamic connection strength, e.g. during motor learning,  
570 can also affect the propensity of the circuit to generate rebound spikes.

571 Experimental studies have shown that rebound activity often involves bursts consisting of several  
572 spikes (Magnin et al., 2000; Bosch-Bouju et al., 2014; Edgerton and Jaeger, 2014). In contrast, our  
573 model here usually responded only with a single rebound spike. In our model this had the advantage  
574 to simplify our quantification of the transmission quality, which would require additional measures  
575 to classify spikes within a rebound burst. Importantly, in a model variation with rebound bursts the  
576 overall effect of correlations on the transmission quality would stay the same (Supplemental Figure  
577 3). While rebound bursts in motor thalamus might play a role for transmitting motor signals further  
578 downstream, this is beyond the scope of this paper.

579 *Functional role of active decorrelation in the basal ganglia*

580 One prominent feature of neural activity in the healthy basal ganglia is the absence of spike  
581 correlations (Bar-Gad et al., 2003). This might be due to the autonomous pacemaking activity  
582 of neurons in globus pallidus externa/interna (GPe/GPi), subthalamic nucleus (STN) and SNr,  
583 as well as other properties of the network such as heterogeneity of firing rates and connectivity  
584 that actively counteracts the synchronisation of activity (Wilson, 2013). While uncorrelated  
585 basal ganglia activity may maximise information transmission (Wilson, 2015), our simulations  
586 demonstrate that it further prevents the occurrence of random pauses in SNr/GPi activity that could  
587 drive thalamic rebound spikes. Thereby, uncorrelated basal ganglia output activity may ensure  
588 that rebound spikes in motor thalamus neurons do usually not occur in healthy animals, or only  
589 occur upon appropriate signals such as the movement-related decreases in basal ganglia output  
590 firing rate. In contrast, correlated basal ganglia output activity leads to rebound activity in motor  
591 thalamus also at baseline SNr activity, i.e. in absence of any motor signal. This decrease in the  
592 signal-to-noise ratio of motor signals may cause problems in motor control.

593 Evidence for the functional relevance of uncorrelated basal ganglia activity originates from the  
594 prominent observation that basal ganglia activity becomes correlated in Parkinson's disease  
595 (Bergman et al., 1998; Nevado-Holgado et al., 2014). Therefore, our simulations with correlated  
596 basal ganglia output activity capture a key aspect of neural activity in Parkinson's disease.  
597 Interestingly, our finding that basal ganglia correlations increase the rate of motor thalamus  
598 rebound spikes is in line with recent experimental findings. In dopamine-depleted mice with



599 Parkinson-like motor symptoms, the rate of motor thalamus rebound spikes was also increased  
600 compared to healthy controls (Kim et al., 2017). Furthermore, an increased trial-to-trial variability  
601 of rebound spikes was found in dopamine-depleted mice, similar to our simulations (Figure 3).

602 Therefore, our results demonstrate the role of uncorrelated activity in the high-fidelity transmission  
603 of motor signals with low trial-to-trial variability from the basal ganglia to motor thalamus.  
604 Uncorrelated activity could be the result of active decorrelation in the basal ganglia (Wilson,  
605 2013). In contrast, pathological correlations may lead to unreliable and noisy transmission of  
606 motor signals with high trial-to-trial variability, potentially contributing to motor symptoms in  
607 Parkinson's disease.

#### 608 *Role of rebound spikes for motor output*

609 In our simulations we only examined the activity of a single thalamocortical neuron. However,  
610 for motor signals propagating further downstream, the coordination of activity among different  
611 thalamocortical neurons might be relevant. Due to the low trial-to-trial variability of the response  
612 latency of rebound spikes (Fig. 6B), in the model pauses in population SNr activity would  
613 lead to synchronous rebound spikes among thalamocortical neurons. In contrast, excitatory,  
614 Poisson inputs from cortex enhanced trial-to-trial variability (Fig. 6B) and thus would not lead to  
615 synchronous activity among thalamocortical neurons. Even though downstream regions cannot  
616 directly distinguish thalamic rebound spikes from excitation-driven spikes, they might read out  
617 synchronous activity that occurs primarily for rebound spikes. Thereby, only coordinated activity

618 in different thalamocortical neurons may lead to movement initiation (Gaidica et al., 2018) or  
619 muscle contraction (Kim et al., 2017). This is in line with the experimental finding showing that,  
620 despite no significant difference in the peak or average firing rates of single unit recordings from  
621 intact and knockout neurons lacking T-type  $\text{Ca}^{2+}$  in the motor thalamus, multi-unit recordings  
622 from intact neurons reached a stronger peak firing rate earlier than the knockout neurons (Kim  
623 et al., 2017). This early activation of a greater proportion of intact neurons after the termination  
624 of the inhibition, which indicates a coordinated activity across neurons, was accompanied by a  
625 muscular response whereas no muscular response was observed in the knockout state (Kim et al.,  
626 2017). Therefore, rebound activity in an individual motor thalamus neuron may not lead to muscle  
627 contraction, but instead synchronous rebound spikes in several motor thalamus neurons may be  
628 required.

629 *Impact of sensory responses on the transmission of motor signals*

630 SNr neurons that decrease their activity during movement also respond to salient sensory stimuli  
631 such as auditory “Go” stimuli cueing movement (Pan et al., 2013; Schmidt et al., 2013). One  
632 proposed functional role for this brief firing rate increase is to prevent impulsive or premature  
633 responses during movement preparation in SNr neurons (Schmidt et al., 2013). In addition, in our  
634 model we observed that, depending on the precise timing, inhibitory inputs mimicking sensory  
635 responses may also promote thalamocortical rebound spikes. This effect was present in the model  
636 when the sensory responses preceded the movement-related decrease by up to 40 ms (Figure 4).

637 In rats performing a stop-signal task the same SNr neurons that responded to the “Go” stimulus  
638 also responded to an auditory “Stop” signal, which prompted the cancellation of the upcoming  
639 movement (Schmidt et al., 2013). These responses were observed in trials, in which the rats  
640 correctly cancelled the movement, but not in trials where they failed to cancel the movement.  
641 These SNr responses to the “Stop” signal may delay movement initiation, allowing another  
642 slower process to completely cancel the planned movement (Mallet et al., 2016). In line with  
643 this “pause-then-cancel” model of stopping (Schmidt and Berke, 2017), we observed that the  
644 SNr sensory responses can also prevent rebound spikes when they occur close to the time of the  
645 motor signal. In our model this suppression effect was present up to 40 ms after the onset of the  
646 movement-related decrease in SNr activity (Figure 4). Thereby, our model provides a prediction  
647 for the temporal window of the functional contribution of sensory responses in SNr to behaviour.  
648 Importantly, sensory responses could either promote or suppress movements, depending on their  
649 relative timing to the motor signal, providing a highly flexible means to integrate sensory and  
650 motor signals in nigrothalamic circuits. However, due to the restricted parameter range in which  
651 our model generated rebound spikes, it is unclear whether the modulation of rebound spiking by  
652 sensory responses could also occur in healthy animals.

### 653 *Effects of deep brain stimulation*

654 In our model correlated basal ganglia activity increased the number of rebound spikes in thalamocortical  
655 neurons. In particular, higher-order correlations lead to pauses in the SNr population activity  
656 promoting rebound spikes, while pairwise correlations alone did not affect the nigrothalamic

657 transmission of motor signals (Figure 2B). This suggests that in Parkinson's disease higher-order  
658 correlations are relevant for motor symptoms, which offers some insight into the potential  
659 mechanisms by which deep-brain stimulation (DBS) might alleviate some of the motor symptoms  
660 such as rigidity and tremor. DBS in the STN and GPi has complex and diverse effects on the  
661 firing rate of neurons in SNr/GPi (Bar-Gad et al., 2004; Zimnik et al., 2015) and thalamus  
662 (Muralidharan et al., 2017). According to our model strong increases in SNr and GPi firing  
663 rates observed after STN DBS (Hashimoto et al., 2003; Maurice et al., 2003), would decrease  
664 the duration of the spontaneous pauses in the population activity (Figure 3C). Thereby, even  
665 for correlated SNr activity, the duration of the pauses would not be long enough to allow the  
666 generation of a rebound spike in the thalamocortical neuron. This conclusion also holds when a  
667 subset of neurons in SNr and GPi decrease their firing rate during STN DBS (Hahn et al., 2008;  
668 Humphries and Gurney, 2012). The decrease in the firing rate would decrease the degree of  
669 correlation by eliminating or displacing the synchronous spike times and therefore weaken the  
670 inhibition preceding the pauses that could have potentially evoked rebound spikes.

## 671 **Acknowledgements**

672 This work was supported by Erasmus Mundus joint PhD program (EuroSPIN), the BrainLinks-BrainTools  
673 Cluster of Excellence funded by the German Research Foundation (DFG, grant number: EXC  
674 1086), the EU H2020 Programme as part of the Human Brain Project (HBP-SGA1, 720270;  
675 HBP-SGA2, 785907), and the University of Sheffield. We also acknowledge support by the state  
676 of Baden-Wuerttemberg through bwHPC and the German Research Foundation (DFG) through

677 grant no INST 39/963-1 FUGG. We would like to thank David Bilkey, Alejandro Jimenez, Lars  
678 Hunger, Amin Mirzaei, and Genela Morris for helpful discussions.

### 679 **Competing Interests**

680 The authors declare no competing financial interests.

### 681 **Author Contributions**

682 Mohammadreza Mohagheghi Nejad and Robert Schmidt designed the research. Robert Schmidt  
683 supervised the work. Mohammadreza Mohagheghi Nejad performed the simulations and analysed  
684 the data. Mohammadreza Mohagheghi Nejad, Stefan Rotter and Robert Schmidt interpreted the  
685 results and wrote the manuscript.

### 686 **Data Accessibility**

687 We provided our simulation scripts (in “BasicModelSimulations” directory) including the scripts  
688 generating input spike trains (in “SpikeTrains” directory) accessible via a git repository `https :`  
689 `//github.com/mmohaghegh/NigrothalamicTransmission.git`.

### 690 **Abbreviations**

691 BIN: Binomially distributed; CX: Cortex; DBS: Deep Brain Stimulation; DLM: Dorsolateral  
692 nucleus of the anterior thalamus; EXP: Exponentially distributed; GABA: gamma-Aminobutyric  
693 acid; GPe: Globus Pallidus externa; GPi: Globus Pallidus interna; SNr: Substantia Nigra pars

694 reticulata; STN: Subthalamic Nucleus; TC: Thalamocortical neuron; TQ: Transmission Quality;

695 **References**

697 Albin RL, Young AB, Penney JB (1989) The functional anatomy of basal ganglia disorders.  
698 Trends in Neurosciences 12:366–375.

699 Alexander GE, Crutcher MD (1990a) Functional architecture of basal ganglia circuits: neural  
700 substrates of parallel processing. Trends in Neurosciences 13:266–271.

701 Alexander GE, Crutcher MD (1990b) Neural representations of the target (goal) of visually guided  
702 arm movements in three motor areas of the monkey. Journal of Neurophysiology 64:164–178.

703 Avila I, Parr-Brownlie LC, Brazhnik E, Castañeda E, Bergstrom DA, Walters JR (2010) Beta  
704 frequency synchronization in basal ganglia output during rest and walk in a hemiparkinsonian rat.  
705 Experimental Neurology 221:307–319.

706 Bar-Gad I, Elias S, Vaadia E, Bergman H (2004) Complex locking rather than complete  
707 cessation of neuronal activity in the globus pallidus of a 1-methyl-4-phenyl-1, 2, 3,  
708 6-tetrahydropyridine-treated primate in response to pallidal microstimulation. Journal of  
709 Neuroscience 24:7410–7419.

710 Bar-Gad I, Heimer G, Ritov Y, Bergman H (2003) Functional correlations between  
711 neighboring neurons in the primate globus pallidus are weak or nonexistent. Journal of  
712 Neuroscience 23:4012–4016.

- 713 Bergman H, Feingold A, Nini A, Raz A, Slovin H, Abeles M, Vaadia E (1998) Physiological  
714 aspects of information processing in the basal ganglia of normal and parkinsonian primates.  
715 Trends in Neurosciences 21:32–38.
- 716 Bodor ÁL, Giber K, Rovó Z, Ulbert I, Acsády L (2008) Structural correlates of efficient gabaergic  
717 transmission in the basal ganglia–thalamus pathway. Journal of Neuroscience 28:3090–3102.
- 718 Bosch-Bouju C, Hyland BI, Parr-Brownlie LC (2013) Motor thalamus integration of cortical,  
719 cerebellar and basal ganglia information: implications for normal and parkinsonian conditions.  
720 Frontiers in Computational Neuroscience 7:163.
- 721 Bosch-Bouju C, Smither RA, Hyland BI, Parr-Brownlie LC (2014) Reduced reach-related  
722 modulation of motor thalamus neural activity in a rat model of parkinson’s disease. Journal of  
723 Neuroscience 34:15836–15850.
- 724 Brown P, Oliviero A, Mazzone P, Insola A, Tonali P, Di Lazzaro V (2001) Dopamine dependency  
725 of oscillations between subthalamic nucleus and pallidum in parkinson’s disease. Journal of  
726 Neuroscience 21:1033–1038.
- 727 Bujan AF, Aertsen A, Kumar A (2015) Role of input correlations in shaping the variability and  
728 noise correlations of evoked activity in the neocortex. Journal of Neuroscience 35:8611–8625.
- 729 Daw ND, Niv Y, Dayan P (2005) Uncertainty-based competition between prefrontal and  
730 dorsolateral striatal systems for behavioral control. Nature Neuroscience 8:1704.



- 731 Deniau J, Chevalier G (1985) Disinhibition as a basic process in the expression of striatal  
732 functions. ii. the striato-nigral influence on thalamocortical cells of the ventromedial thalamic  
733 nucleus. Brain Research 334:227–233.
- 734 Destexhe A, Contreras D, Steriade M (1998) Mechanisms underlying the synchronizing  
735 action of corticothalamic feedback through inhibition of thalamic relay cells. Journal of  
736 Neurophysiology 79:999–1016.
- 737 Edgerton JR, Jaeger D (2014) Optogenetic activation of nigral inhibitory inputs to motor thalamus  
738 in the mouse reveals classic inhibition with little potential for rebound activation. Frontiers in  
739 Cellular Neuroscience 8:36.
- 740 Ermentrout GB, Terman DH (2010) Mathematical foundations of neuroscience, Vol. 35 Springer  
741 Science & Business Media.
- 742 Gaidica M, Hurst A, Cyr C, Leventhal DK (2018) Distinct populations of motor thalamic neurons  
743 encode action initiation, action selection, and movement vigor. Journal of Neuroscience .
- 744 Gerstner W, Kistler WM (2002) Spiking neuron models: Single neurons, populations, plasticity  
745 Cambridge University Press.
- 746 Goldberg JH, Farries MA, Fee MS (2012) Integration of cortical and pallidal inputs in the basal  
747 ganglia-recipient thalamus of singing birds. Journal of Neurophysiology 108:1403–1429.
- 748 Goldberg JH, Farries MA, Fee MS (2013) Basal ganglia output to the thalamus: still a paradox.  
749 Trends in Neurosciences 36:695–705.

- 750 Goldberg JH, Fee MS (2012) A cortical motor nucleus drives the basal ganglia-recipient thalamus  
751 in singing birds. Nature Neuroscience 15:620–627.
- 752 Guo Y, Rubin JE, McIntyre CC, Vitek JL, Terman D (2008) Thalamocortical relay fidelity  
753 varies across subthalamic nucleus deep brain stimulation protocols in a data-driven computational  
754 model. Journal of Neurophysiology 99:1477–1492.
- 755 Guo ZV, Inagaki HK, Daie K, Druckmann S, Gerfen CR, Svoboda K (2017) Maintenance of  
756 persistent activity in a frontal thalamocortical loop. Nature 545:181–186.
- 757 Haber SN, Calzavara R (2009) The cortico-basal ganglia integrative network: the role of the  
758 thalamus. Brain Research Bulletin 78:69–74.
- 759 Hahn PJ, Russo GS, Hashimoto T, Miocinovic S, Xu W, McIntyre CC, Vitek JL (2008) Pallidal  
760 burst activity during therapeutic deep brain stimulation. Experimental Neurology 211:243–251.
- 761 Hashimoto T, Elder CM, Okun MS, Patrick SK, Vitek JL (2003) Stimulation of the subthalamic  
762 nucleus changes the firing pattern of pallidal neurons. Journal of Neuroscience 23:1916–1923.
- 763 Herd MB, Brown AR, Lambert JJ, Belelli D (2013) Extrasynaptic gabaa receptors couple  
764 presynaptic activity to postsynaptic inhibition in the somatosensory thalamus. Journal of  
765 Neuroscience 33:14850–14868.
- 766 Hikosaka O, Takikawa Y, Kawagoe R (2000) Role of the basal ganglia in the control of purposive  
767 saccadic eye movements. Physiological Reviews 80:953–978.

- 768 Hikosaka O, Wurtz RH (1983) Visual and oculomotor functions of monkey substantia  
769 nigra pars reticulata. iv. relation of substantia nigra to superior colliculus. Journal of  
770 Neurophysiology 49:1285–1301.
- 771 Huguenard J, Prince D (1994) Intrathalamic rhythmicity studied in vitro: nominal t-current  
772 modulation causes robust antioscillatory effects. Journal of Neuroscience 14:5485–5502.
- 773 Humphries MD, Gurney K (2012) Network effects of subthalamic deep brain stimulation  
774 drive a unique mixture of responses in basal ganglia output. European Journal of  
775 Neuroscience 36:2240–2251.
- 776 Kase D, Uta D, Ishihara H, Imoto K (2015) Inhibitory synaptic transmission from the substantia  
777 nigra pars reticulata to the ventral medial thalamus in mice. Neuroscience Research 97:26–35.
- 778 Kim J, Kim Y, Nakajima R, Shin A, Jeong M, Park AH, Jeong Y, Jo S, Yang S, Park H  
779 et al. (2017) Inhibitory basal ganglia inputs induce excitatory motor signals in the thalamus.  
780 Neuron 95:1181–1196.
- 781 Kojima S, Doupe AJ (2009) Activity propagation in an avian basal ganglia-thalamocortical circuit  
782 essential for vocal learning. Journal of Neuroscience 29:4782–4793.
- 783 Kravitz AV, Freeze BS, Parker PR, Kay K, Thwin MT, Deisseroth K, Kreitzer AC (2010)  
784 Regulation of parkinsonian motor behaviours by optogenetic control of basal ganglia circuitry.  
785 Nature 466:622–626.

786 Kuhn A, Aertsen A, Rotter S (2003) Higher-order statistics of input ensembles and the response  
787 of simple model neurons. Neural Computation 15:67–101.

788 Kumar A, Cardanobile S, Rotter S, Aertsen A (2011) The role of inhibition in generating  
789 and controlling parkinson's disease oscillations in the basal ganglia. Frontiers in Systems  
790 Neuroscience 5:86.

791 Kuramoto E, Fujiyama F, Nakamura KC, Tanaka Y, Hioki H, Kaneko T (2011) Complementary  
792 distribution of glutamatergic cerebellar and gabaergic basal ganglia afferents to the rat motor  
793 thalamic nuclei. European Journal of Neuroscience 33:95–109.

794 Laudes T, Meis S, Munsch T, Lessmann V (2012) Impaired transmission at corticothalamic  
795 excitatory inputs and intrathalamic gabaergic synapses in the ventrobasal thalamus of  
796 heterozygous bdnf knockout mice. Neuroscience 222:215–227.

797 Leblois A, Bodor ÁL, Person AL, Perkel DJ (2009) Millisecond timescale disinhibition  
798 mediates fast information transmission through an avian basal ganglia loop. Journal of  
799 Neuroscience 29:15420–15433.

800 Leblois A, Meissner W, Bezard E, Bioulac B, Gross CE, Boraud T (2006) Temporal and spatial  
801 alterations in gpi neuronal encoding might contribute to slow down movement in parkinsonian  
802 monkeys. European Journal of Neuroscience 24:1201–1208.

- 803 Leblois A, Meissner W, Bioulac B, Gross CE, Hansel D, Boraud T (2007) Late emergence of  
804 synchronized oscillatory activity in the pallidum during progressive parkinsonism. European  
805 Journal of Neuroscience 26:1701–1713.
- 806 Lindahl M, Kotaleski JH (2016) Untangling basal ganglia network dynamics and  
807 function–role of dopamine depletion and inhibition investigated in a spiking network model.  
808 Eneuro 3:ENEURO.0156–16.2016.
- 809 Llinás R, Jahnsen H (1982) Electrophysiology of mammalian thalamic neurones in vitro.  
810 Nature 297:406.
- 811 Magnin M, Morel A, Jeanmonod D (2000) Single-unit analysis of the pallidum, thalamus and  
812 subthalamic nucleus in parkinsonian patients. Neuroscience 96:549–564.
- 813 Mallet N, Schmidt R, Leventhal D, Chen F, Amer N, Boraud T, Berke JD (2016) Arkypallidal  
814 cells send a stop signal to striatum. Neuron 89:308–316.
- 815 Maurice N, Thierry AM, Glowinski J, Deniau JM (2003) Spontaneous and evoked activity of  
816 substantia nigra pars reticulata neurons during high-frequency stimulation of the subthalamic  
817 nucleus. Journal of Neuroscience 23:9929–9936.
- 818 Mirzaei A, Kumar A, Leventhal D, Mallet N, Aertsen A, Berke J, Schmidt R (2017) Sensorimotor  
819 processing in the basal ganglia leads to transient beta oscillations during behavior. Journal of  
820 Neuroscience 37:1289–17.

- 821 Muralidharan A, Zhang J, Ghosh D, Johnson MD, Baker KB, Vitek JL (2017) Modulation of  
822 neuronal activity in the motor thalamus during gpi-dbs in the mptp nonhuman primate model of  
823 parkinson's disease. Brain Stimulation 10:126–138.
- 824 Nevado-Holgado AJ, Mallet N, Magill PJ, Bogacz R (2014) Effective connectivity of the  
825 subthalamic nucleus–globus pallidus network during parkinsonian oscillations. The Journal of  
826 Physiology 592:1429–1455.
- 827 Pan WX, Brown J, Dudman JT (2013) Neural signals of extinction in the inhibitory microcircuit  
828 of the ventral midbrain. Nature Neuroscience 16:71.
- 829 Person AL, Perkel DJ (2005) Unitary ipsp drive precise thalamic spiking in a circuit required for  
830 learning. Neuron 46:129–140.
- 831 Person AL, Perkel DJ (2007) Pallidal neuron activity increases during sensory relay through  
832 thalamus in a songbird circuit essential for learning. Journal of Neuroscience 27:8687–8698.
- 833 Redgrave P, Prescott TJ, Gurney K (1999) The basal ganglia: a vertebrate solution to the selection  
834 problem? Neuroscience 89:1009–1023.
- 835 Redgrave P, Rodriguez M, Smith Y, Rodriguez-Oroz MC, Lehericy S, Bergman H, Agid Y,  
836 DeLong MR, Obeso JA (2010) Goal-directed and habitual control in the basal ganglia:  
837 implications for parkinson's disease. Nature Reviews Neuroscience 11:760.
- 838 Reitsma P, Doiron B, Rubin JE (2011) Correlation transfer from basal ganglia to thalamus in  
839 parkinson's disease. Frontiers in Computational Neuroscience 5:58.

- 840 Rinzel J (1985a) Excitation dynamics: insights from simplified membrane models In Fed. Proc.,  
841 Vol. 44, pp. 2944–2946.
- 842 Rinzel J (1985b) Excitation dynamics: insights from simplified membrane models In Fed. Proc.,  
843 Vol. 44, pp. 2944–2946.
- 844 Rubin JE, Terman D (2004) High frequency stimulation of the subthalamic nucleus eliminates  
845 pathological thalamic rhythmicity in a computational model. Journal of Computational  
846 Neuroscience 16:211–235.
- 847 Saito Y, Isa T (1999) Electrophysiological and morphological properties of neurons in the rat  
848 superior colliculus. i. neurons in the intermediate layer. Journal of Neurophysiology 82:754–767.
- 849 Schmidt R, Berke JD (2017) A pause-then-cancel model of stopping: evidence from basal ganglia  
850 neurophysiology. Phil. Trans. R. Soc. B 372:20160202.
- 851 Schmidt R, Leventhal DK, Mallet N, Chen F, Berke JD (2013) Canceling actions involves a race  
852 between basal ganglia pathways. Nature Neuroscience 16:1118.
- 853 Schultz W (1986) Activity of pars reticulata neurons of monkey substantia nigra in relation to  
854 motor, sensory, and complex events. Journal of Neurophysiology 55:660–677.
- 855 Schwab BC, Kase D, Zimnik A, Rosenbaum R, Codianni MG, Rubin JE, Turner RS (2020) Neural  
856 activity during a simple reaching task in macaques is counter to gating and rebound in basal  
857 ganglia–thalamic communication. PLOS Biology 18:1–38.

- 858 Staude B, Grün S, Rotter S (2010) Higher-order correlations and cumulants In Analysis of parallel  
859 spike trains, pp. 253–280. Springer.
- 860 Ulrich D, Huguenard JR (1997) Nucleus-specific chloride homeostasis in rat thalamus. Journal  
861 of Neuroscience 17:2348–2354.
- 862 Wichmann T, DeLong MR (1996) Functional and pathophysiological models of the basal ganglia.  
863 Current Opinion in Neurobiology 6:751–758.
- 864 Wilson CJ (2013) Active decorrelation in the basal ganglia. Neuroscience 250:467–482.
- 865 Wilson CJ (2015) Oscillators and oscillations in the basal ganglia. The  
866 Neuroscientist 21:530–539.
- 867 Yin HH, Knowlton BJ (2006) The role of the basal ganglia in habit formation. Nature Reviews  
868 Neuroscience 7:464.
- 869 Zimnik AJ, Nora GJ, Desmurget M, Turner RS (2015) Movement-related discharge in the  
870 macaque globus pallidus during high-frequency stimulation of the subthalamic nucleus. Journal  
871 of Neuroscience 35:3978–3989.



## List of Tables

**Table 1.** Model parameters

| Parameter type                   | Parameter, value and unit                                                                                                                                  |
|----------------------------------|------------------------------------------------------------------------------------------------------------------------------------------------------------|
| Ionic channel conductance        | $g_L = 0.05 \text{ nS}/\mu\text{m}^2$<br>$g_{Na} = 3 \text{ nS}/\mu\text{m}^2$<br>$g_T = 5 \text{ nS}/\mu\text{m}^2$<br>$g_K = 5 \text{ nS}/\mu\text{m}^2$ |
| Ionic channel reversal potential | $E_L = -70 \text{ mV}$<br>$E_{Na} = 50 \text{ mV}$<br>$E_T = 0 \text{ mV}$<br>$E_K = -90 \text{ mV}$                                                       |
| Synaptic reversal potential      | $v_{SNr \rightarrow TC} = -85 \text{ mV}$<br>$v_{CX \rightarrow TC} = 0 \text{ mV}$                                                                        |
| Synaptic decay constant          | $\beta_{SNr \rightarrow TC} = 0.08 \text{ ms}^{-1}$<br>$\beta_{CX \rightarrow TC} = 0.18 \text{ ms}^{-1}$                                                  |

Parameters were taken from Rubin and Terman, 2004 and Ermentrout and Terman, 2010.

## 873 **Figure Legends**

874 **Figure 1** Generation of correlated Poisson spike trains used as input to the model neuron. (A,  
875 top) The event amplitude distribution of the higher-order correlations was determined for spike  
876 trains generated by a multiple interaction process with  $\varepsilon = 0.3$  and  $r = 50$  Hz. The bottom panel  
877 shows the raster plot of 30 respective example spike trains. (B, top) Alternatively, the event  
878 amplitude distribution of higher-order correlations followed an exponential amplitude distribution  
879 with  $\varepsilon = 0.3$  and  $r = 50$  Hz, and corresponding example spike trains (bottom panel). (C) The  
880 parameter  $\tau$  of the exponential amplitude distributions determined the resulting average pairwise  
881 correlation  $\varepsilon$  (red trace). Black dots represent the average pairwise correlations that we used to  
882 generate input spike trains with an exponential amplitude distribution.

883

884 **Figure 2** Input spike correlations impair the transmission quality (TQ) of motor signals from  
885 SNr to thalamus. (A) Top panels show the intracellular response of the thalamocortical model  
886 neuron to the inhibitory input spike trains from SNr displayed in the bottom panels. Uncorrelated  
887 Poisson spike trains ( $\varepsilon = 0$ ) led to high-fidelity transmission (TQ = 1) via a single rebound spike  
888 after the firing rate decrease in the input (leftmost panel). Correlated Poisson spike trains, however,  
889 led to rebound spikes at random times, whenever there is a pause in the input spike trains (left  
890 middle panel:  $\varepsilon = 0.2$  leading to TQ = 0.5, right middle panel:  $\varepsilon = 0.35$  leading to TQ = 0.33  
891 and rightmost panel:  $\varepsilon = 0.7$  leading to TQ = 0.25). (B) Impact of input correlations on TQ  
892 depended on the correlation model (BIN, binomial; EXP, exponential; BIN&EXP, mixture of

893 both). Note that the exponential distribution of the event amplitudes had a maximum average  
894 pairwise correlation of 0.65 (see Materials and Methods). The black dot marks the TQ for the  
895 spike trains generated using the event amplitude distribution shown in (E). (C) For the binomial  
896 correlation model, jittering the input spike times decreased the TQ only for long jitter time  
897 windows (50ms), indicating that correlations on longer time scales are overall less detrimental. (D)  
898 The threshold correlation at which the transmission quality deteriorated ( $TQ < 0.95$ ) only weakly  
899 depended on the inhibitory input strength (same legend as in B). (E) The simulation of Parkinson's  
900 disease in a large-scale model of the basal ganglia yielded an event amplitude distribution of SNr  
901 spike times that corresponded to a mixture of the exponential and binomial amplitude distributions.  
902

903 **Figure 3** Correlated SNr spike trains decrease transmission speed and temporal precision of  
904 rebound spikes. Systematic investigation of average transmission latency (A) and its standard  
905 deviation (B) for different degrees of correlation and inhibitory strengths identified the range with  
906 fastest transmission speed and highest transmission precision, respectively. (C) Left panel shows a  
907 sample membrane potential ( $g_{SNr \rightarrow TC} = 0.70 \text{ nS}/\mu\text{m}^2$ ,  $\varepsilon = 0.7$ ; top) of the thalamocortical model  
908 neuron and the corresponding inhibitory inputs (bottom). Note that rebound spikes were preceded  
909 by pauses in the input raster plot (indicated by black horizontal bars). However, for very short  
910 pauses (indicated by grey horizontal bars) no rebound spikes occurred. Averages triggered by  
911 rebound spikes for weakly correlated inputs (C, middle panel) and strongly correlated inputs (C,  
912 right panel) confirmed that pauses in the inhibitory input preceded rebound spikes. The duration  
913 of the pause preceding the rebound spikes reflected the transmission latency. The inset symbols (#,

914 \*) in (A) indicate the parameters used for the corresponding spike-triggered averages in (C).

915

916 **Figure 4** Sensory responses in SNr firing rate change the probability of rebound spikes in the  
917 thalamocortical model neuron. (A) The simulations used an average firing rate as input, which  
918 reflected the SNr firing rate with a movement-related decrease (black line). Sensory responses  
919 (red lines) were then added to the input at different time points relative to the movement-related  
920 decrease. Here two example timings are shown, before (solid) and after (dash-dot) the movement-related  
921 decrease. (B) The timing of the sensory responses relative to the movement-related decrease was  
922 varied systematically (x-axis). For a given relative timing, we determined whether rebound spikes  
923 were suppressed (blue area) or facilitated (yellow area; here  $g_{SNr \rightarrow TC} = 0.29 \text{ nS}/\mu\text{m}^2$ ). Note the  
924 large impact of the timing of the sensory response on the probability of rebound spikes, even if it  
925 occurred in only a small subset of neurons. (C) The input strength  $g_{SNr \rightarrow TC}$  affects the suppression  
926 and facilitation of rebound spikes. Here the change in rebound probability was averaged across the  
927 number of inputs with sensory responses (across y-axis in B).

928

929 **Figure 5** Effect of precisely timed excitatory input spikes on rebound spiking. (A) The generation  
930 of rebound spikes requires that a large fraction of the inhibitory input spike trains exhibit a  
931 movement-related decrease in firing rate, largely independent of their input strength. (B) Adding  
932 a single excitatory spike as input to the thalamocortical model neuron strongly increases the  
933 probability of rebound spike generation compared to pure inhibitory inputs (letter “B” in panel A).  
934 Note that this occurs in a regime, in which usually no rebound spike can be generated because not

935 enough (here 22 out of 30) neurons decrease their firing rate. (C) In a regime, in which usually  
936 rebound spikes are generated (letter “C” in panel A), adding a single excitatory spike as input to  
937 the thalamocortical neuron decreases the probability of rebound spike generation compared to pure  
938 inhibitory inputs. (D) Systematic investigation of the parameter space indicates a narrow regime,  
939 in which a single excitatory spike can decrease, and a larger regime, in which it can increase the  
940 probability of a rebound spike. Here, the probability changes are averaged over excitatory input  
941 strengths.

942

943 **Figure 6** Smooth transition from rebound to disinhibition transmission mode. (A) The probability  
944 of rebound spikes only gradually decreased with stronger excitatory inputs, indicating a large  
945 parameter regime in which the rebound and disinhibition transmission modes coexisted. The  
946 yellow area marks the regime in which transmission was exclusively mediated by rebound spiking,  
947 while in dark blue areas the basal ganglia output only disinhibited cortical excitation. The white  
948 isolines illustrate the baseline firing rate of the model neuron (i.e. the firing rate before the  
949 onset of the movement-related decrease in the input). In the small grey region (bottom left)  
950 the model neuron did not fire. (B) The standard deviation of the latency (across trials) of the  
951 first thalamocortical spike relative the movement-related decrease distinguished rebound from  
952 disinhibition transmission modes. For the rebound mode (i.e. yellow area in A) the standard  
953 deviation was almost always the lowest, and the regime in which rebound and disinhibition  
954 coexisted the standard deviation was markedly higher. White contour line shows the boundaries  
955 of the yellow area in panel (A), where the transmission was exclusively mediated by rebound

956 spiking. (C-E) Sample firing rate profiles and corresponding raster plots show the activity of the  
957 thalamocortical neuron in different parts of the parameter regime (as indicated by the corresponding  
958 letters in A) with rebound spiking only (C), coexistence of rebound and disinhibition (D-E) and  
959 disinhibition only (F).

960

961

962 **Supplemental Figure 1** Robustness of the model response to inhibitory synapse parameters. (A)  
963 Comparison of gating variable equilibrium values as a function of the membrane potential between  
964 our model and the one from Destexhe et al. (1998). (B) Transmission quality of our model  
965 measured in response to 30 synaptic inputs that decrease their activity from 50Hz to 0 at the  
966 time of movement onset. Our model produces high transmission quality also beyond the default  
967 parameter for reversal potential ( $-85mV$ ). (C) Adapting the settings from Destexhe et al. (1998) for  
968 gating variables equilibrium values for our model only slightly decreases the transmission quality  
969 in comparison to the default parameter settings in panel (B). (D) Exposing the model neuron to  
970 30 synchronous spikes arriving at the synapse (GABA maximum conductance =  $1nS/\mu m^2$ ) at time  
971 0ms hyperpolarises the membrane potential from  $-64.7mV$  to  $-81.7mV$ . This hyperpolarisation  
972 is strong enough to evoke a post-inhibitory rebound spike in our model, which is very close to the  
973 hyperpolarisation ( $18mV$ ) of thalamocortical neurons in motor thalamus in vitro (see Figure 5B in  
974 Edgerton and Jaeger (2014)).

975 **Supplemental Figure 2** The effect of the number of inhibitory inputs on the probability of rebound

976 spike generation. Reducing the number of inputs from 30 (default value used throughout this study)  
977 to 20 does not substantially change the probability of rebound spikes in the model. However, to  
978 generate rebound spikes with high probability for less than 20 inputs, the model requires stronger  
979 inhibition (higher  $G_{SNr \rightarrow TC}$ ).

980 **Supplemental Figure 3** Modified model in which rebound spiking involves a burst of action  
981 potentials (original model in blue, modified model in red). (A) The modified model had a higher  
982 voltage-dependent time constant of the inactivation gating variable  $\tau_r$  for most values for the  
983 model membrane potential. (B) Simulation with correlated inhibitory inputs firing at  $50Hz$  and  
984 a movement-related decrease in the firing rates. The increase in the time constant in the modified  
985 model leads to rebound bursts (red line), as can be seen by the additional spikes compared to  
986 the original model (blue line). (C) The modified model preserved the overall decrease in the  
987 transmission quality as a function of correlation, with a slightly lower transmission quality for  
988 intermediate correlations in the modified model.

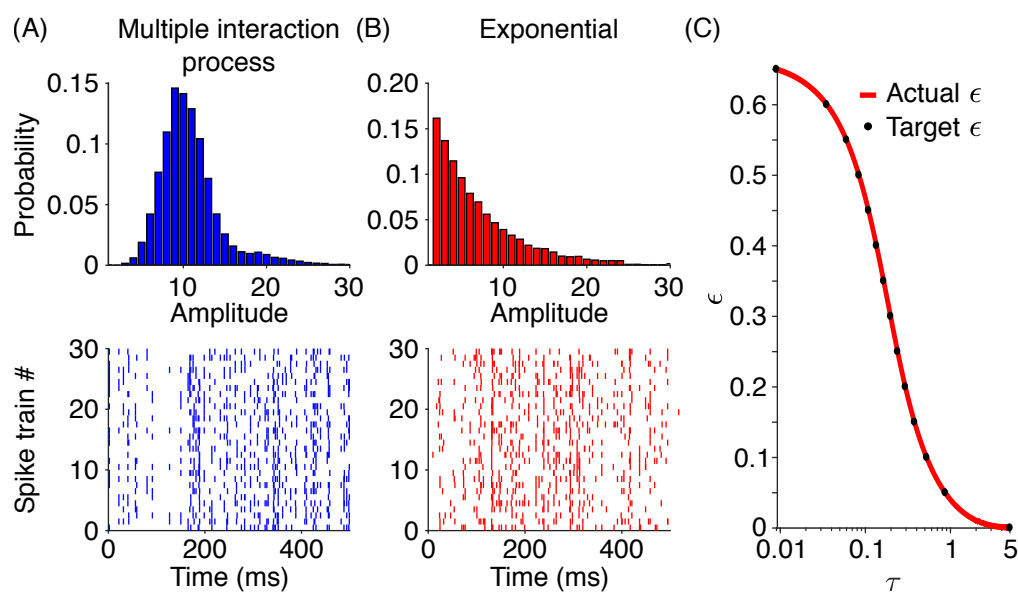

Figure 1



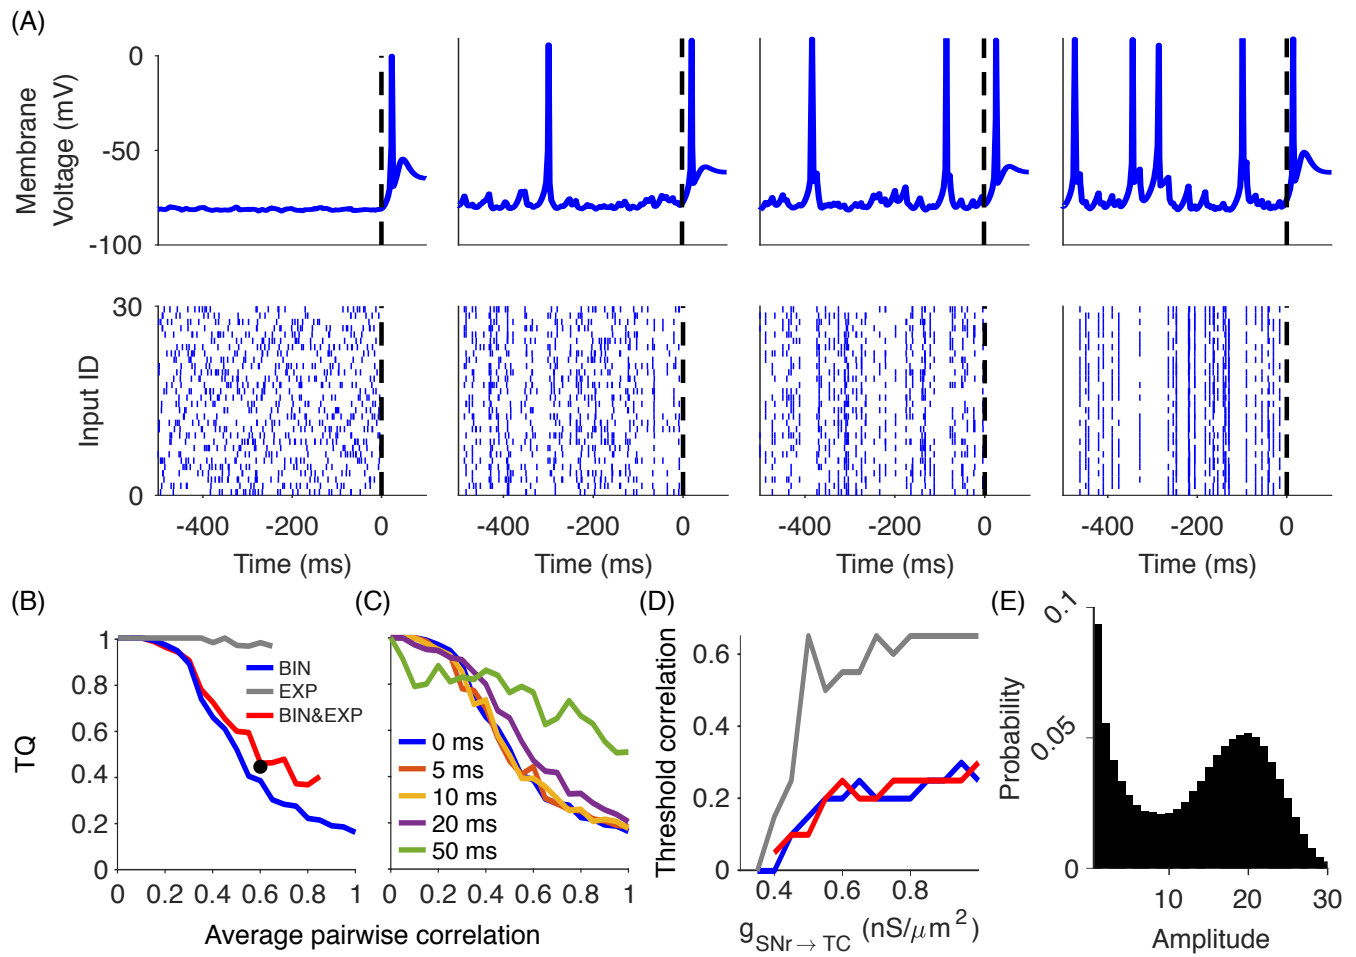

Figure 2

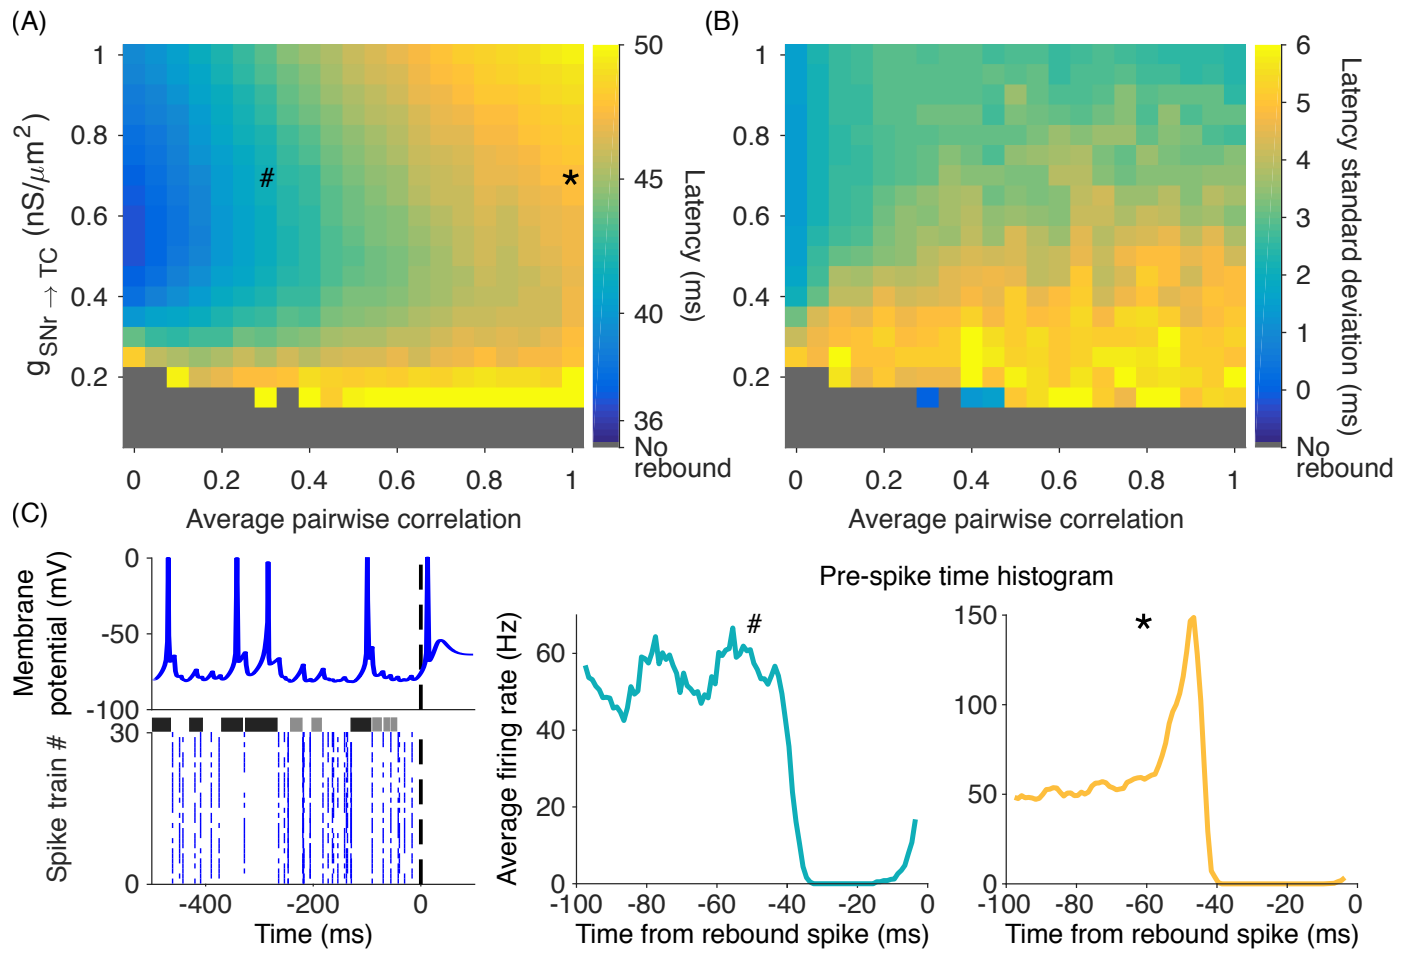

**Figure 3**

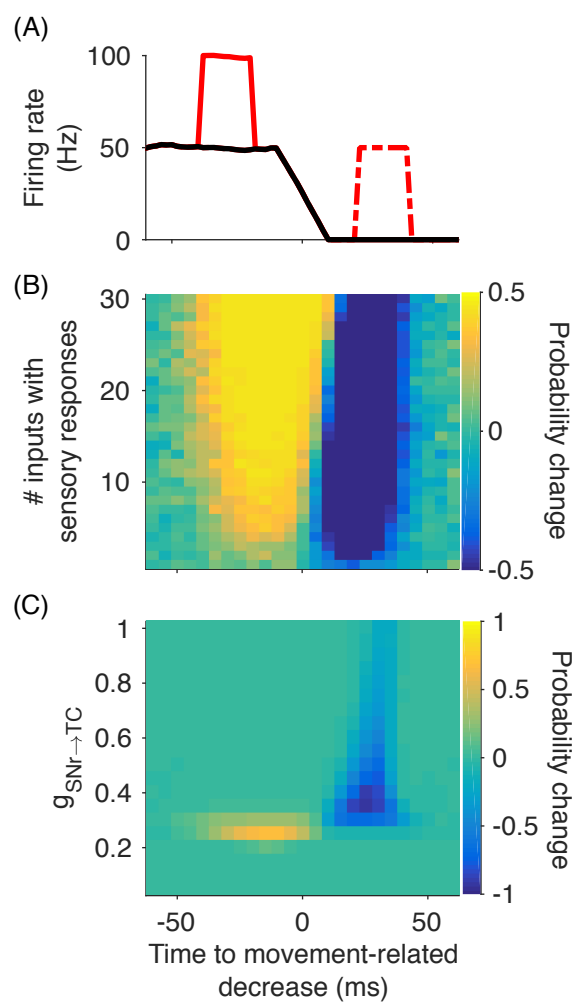

**Figure 4**

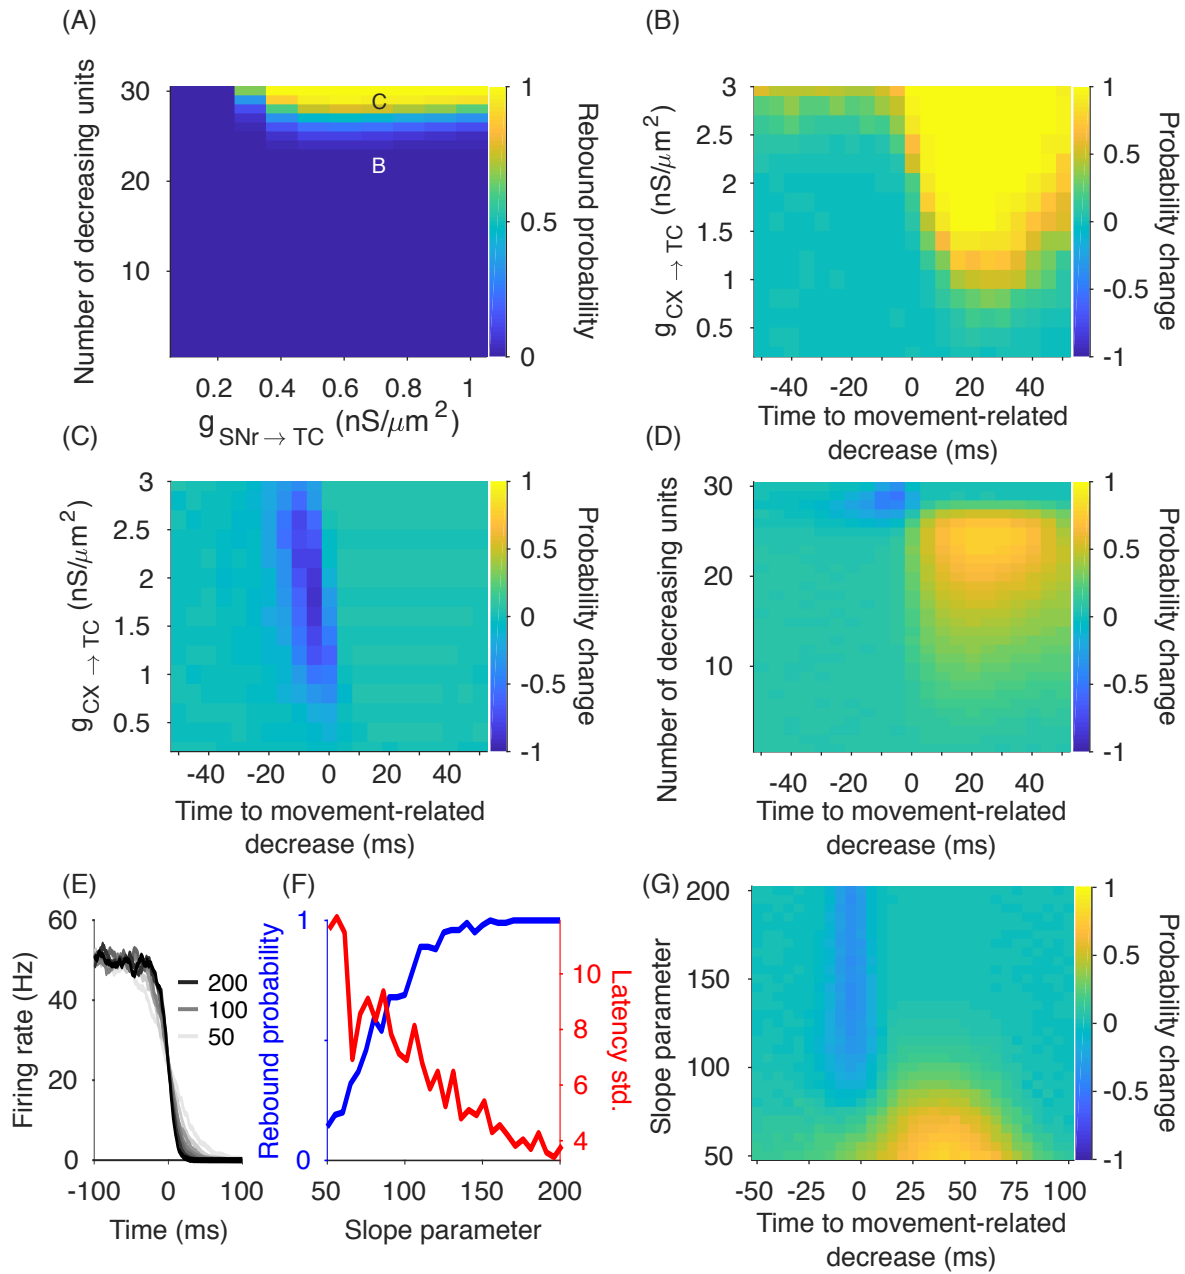

Figure 5

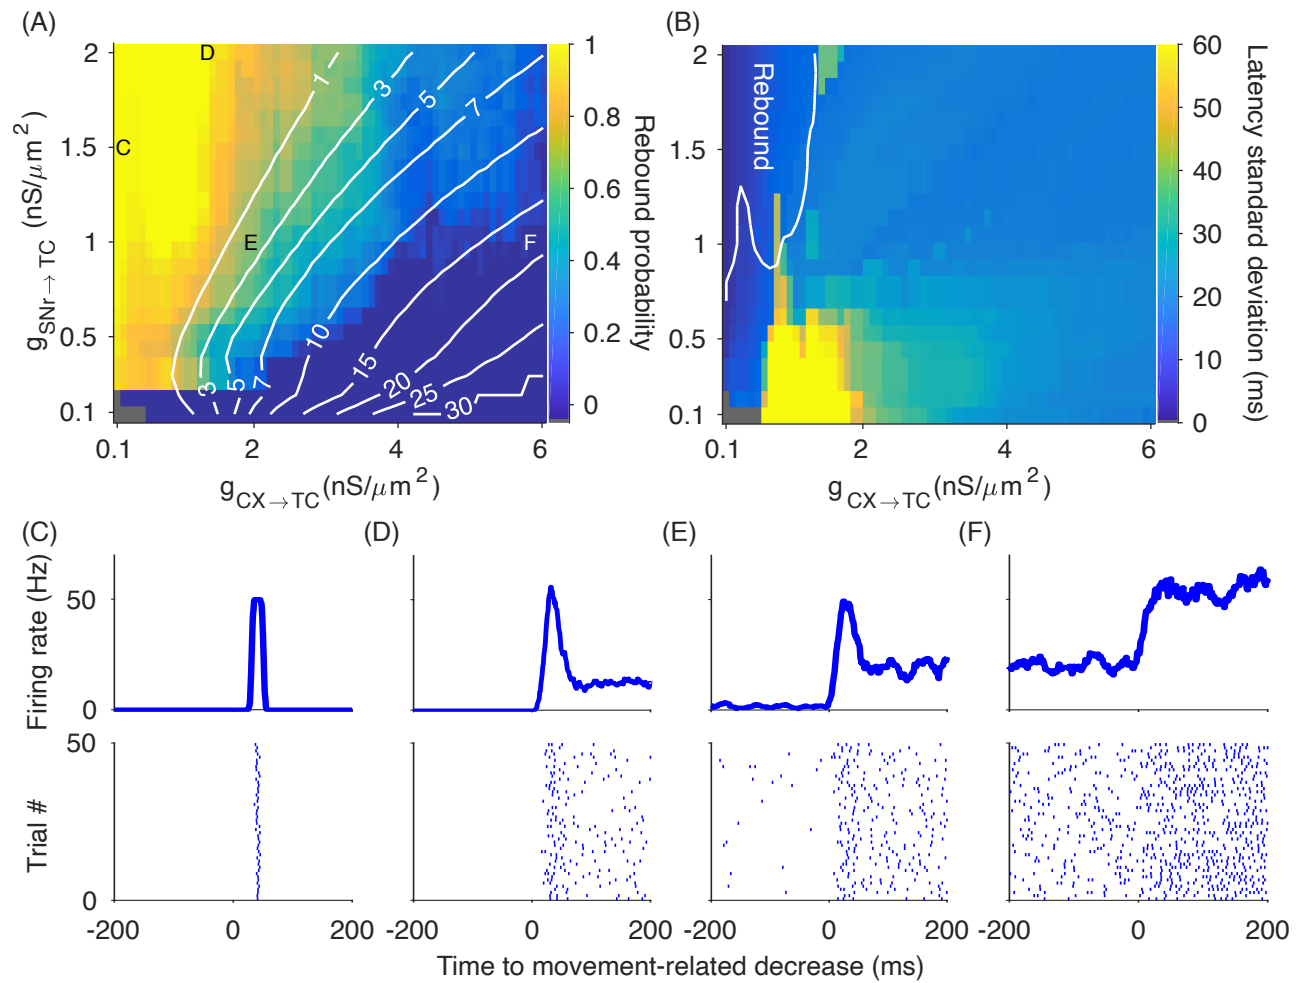

Figure 6

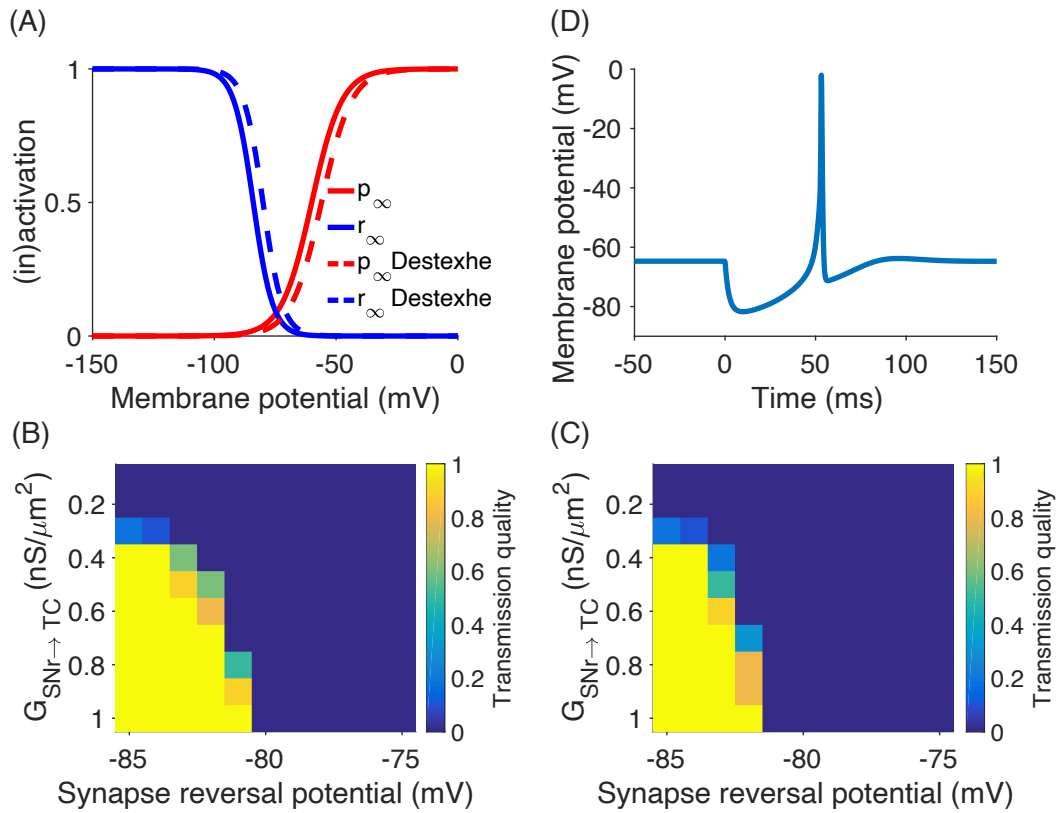

Supplemental Figure 1

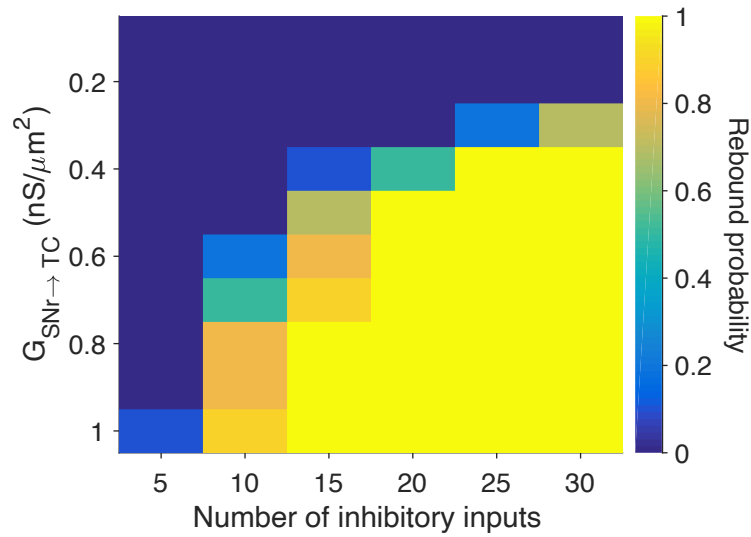

**Supplemental Figure 2**

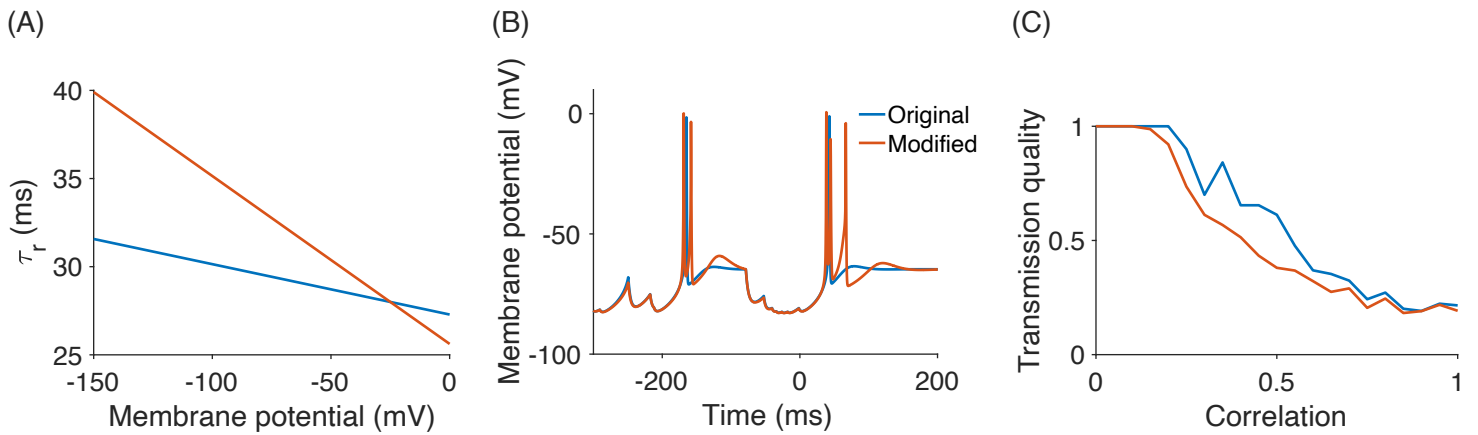

**Supplemental Figure 3**
